# Supplementary material for: Indonesian parental knowledge, attitudes, and sources of information regarding pediatric space maintainers: a cross-sectional questionnaire-based study
Source: PeerJ journal article supplement (doi:10.7717/peerj.20363), 2026-01-05
Supplement: Questionnaire.pdf [file Questionnaire.pdf]

# Survey Questionnaire: Parental Knowledge and Attitudes About Pediatric Space Maintainers

## Section 1: Demographic Information

1. What is your age group?
  - Under 25
  - 25-34
  - 35-44
  - 45-54
2. What is your gender?
  - Male
  - Female
  - Non-binary
3. What is your highest educational qualification?
  - Undergraduate Degree
  - Postgraduate Degree
  - PhD
  - Professional Degree
4. How many children do you have?
  - 0
  - 1
  - 2
  - 3 or more

## Section 2: Knowledge About Space Maintainers (Close-Ended)

5. Have you ever heard of a space maintainer?
  - Yes
  - No
6. What do you believe is the main purpose of a space maintainer? (Choose one)
  - To maintain space for permanent teeth to erupt
  - To correct crooked teeth
  - To reduce tooth decay
  - I don't know
7. Which of the following are types of space maintainers you are aware of? (Select all that apply)

- Band and loop
- Crown and loop
- Lingual arch
- Distal shoe
- I have heard of space maintainers, but cannot name any
- I don't know any types

8. In your opinion, how common is the use of space maintainers in children?

- Very common
- Somewhat common
- Rare
- I-m not sure

9. Do you think space maintainers are necessary if a child loses a tooth early?

- Yes, always
- Sometimes
- No, never
- I-m not sure

### **Section 3: Attitudes Toward Space Maintainers**

9. How comfortable are you with using a space maintainer for your child?

- Very comfortable
- Somewhat comfortable
- Neutral
- Somewhat uncomfortable
- Very uncomfortable

10. If uncomfortable, what are your reasons? (Select all that apply)

- Cost
- Fear of complications
- Lack of knowledge
- Other (please specify)

11. Would you be willing to consider a second opinion if advised to use a space maintainer?

- Very willing
- Somewhat willing
- Not very willing
- Not willing at all

12. Would you consider any alternatives to space maintainers (e.g., braces)?

- Yes
- No
- Unsure

#### **Section 4: Information Sources**

13. Where did you first hear about space maintainers?

- Dentist
- Social Media
- Community
- Other

14. Have you discussed space maintainers with a dental professional?

- Yes
- No

15. Have you received information on this topic from other parents or forums?

- Yes
- No

16. Have you searched the internet to learn more about space maintainers?

- Yes
- No
