# Supplementary material for: Indonesian parental knowledge, attitudes, and sources of information regarding pediatric space maintainers: a cross-sectional questionnaire-based study
Source: PeerJ. 2026 Jan 5;14:e20363. doi: 10.7717/peerj.20363 (PMC12782031; doi:10.7717/peerj.20363)
Supplement: Supplemental Information 1 [file peerj-14-20363-s001.xlsx]

## Sheet: Sheet1
Respondent ID	Residential Area	Age Group	Gender	Education Level	Number of Children	Aware of Space Maintainers	Comfort Level	Willingness to Take Second Opinion	Considered Alternatives	Belief_Space_Maintainers	Discussed_With_Professional	Forum_Info	Parent_Advice_Influence	Information_Sources	Dental Visit Data Availability	Preventive Dental Visit	Visited Dentist for Medical Issue	Never Visited Dentist	Awareness (Binary)	Functional Knowledge Correct	Could Name Devices	Source: Dentist	Source: Community	Source: Social Media	Comfort Score (1-5)
U-1	Urban	25-34	Female	PhD	2	Yes	Somewhat comfortable	Somewhat willing	Yes	Yes	Yes	No	Very influential	General dentist	Not collected in this dataset	Yes	No	No	1	Yes	Named	TRUE	FALSE	FALSE	4
U-2	Urban	45-54	Male	Undergraduate Degree	1	Yes	Very comfortable	Very willing	Yes	Yes	Yes	Yes	Somewhat influential	Paediatric dentist	Not collected in this dataset	Yes	No	No	1	Yes	Named	TRUE	FALSE	FALSE	5
U-3	Urban	45-54	Female	Undergraduate Degree	0	No	Very comfortable	Very willing	Yes	Yes	Yes	No	Neutral	Family and friends	Not collected in this dataset	Yes	No	No	0			FALSE	FALSE	FALSE	5
U-4	Urban	Under 25	Female	Postgraduate Degree	2	No	Very comfortable	Not willing at all	Unsure	Yes	Yes	No	Somewhat influential	Internet	Not collected in this dataset	Yes	No	No	0			FALSE	FALSE	TRUE	5
U-5	Urban	25-34	Male	Undergraduate Degree	0	Yes	Somewhat comfortable	Not very willing	Yes	Yes	Yes	No	Very influential	Family and friends, Paediatric dentist	Not collected in this dataset	Yes	No	No	1	Yes	Named	TRUE	FALSE	FALSE	4
U-6	Urban	25-34	Female	PhD	1	Yes	Very comfortable	Not very willing	Unsure	Yes	Yes	Yes	Very influential	Family and friends, General dentist, Internet	Not collected in this dataset	Yes	No	No	1	Yes	Named	TRUE	FALSE	TRUE	5
U-7	Urban	25-34	Male	Professional Degree	1	Yes	Very comfortable	Not very willing	Yes	Yes	Yes	Yes	Somewhat influential	Family and friends, Paediatric dentist	Not collected in this dataset	Yes	No	No	1	Yes	Named	TRUE	FALSE	FALSE	5
U-8	Urban	25-34	Female	Postgraduate Degree	1	No	Very comfortable	Somewhat willing	No	Yes	Yes	No	Not influential at all	Family and friends, Books or educational materials	Not collected in this dataset	Yes	No	No	0			FALSE	FALSE	FALSE	5
U-9	Urban	Under 25	Male	Postgraduate Degree	0	No	Somewhat comfortable	Very willing	Yes	Yes	Yes	Yes	Neutral	Internet	Not collected in this dataset	Yes	No	No	0			FALSE	FALSE	TRUE	4
U-10	Urban	Under 25	Female	Undergraduate Degree	1	No	Very comfortable	Very willing	Yes	Yes	No	Yes	Somewhat influential	Paediatric dentist	Not collected in this dataset	Yes	No	No	0			TRUE	FALSE	FALSE	5
U-11	Urban	35-44	Male	Postgraduate Degree	2	No	Very comfortable	Not very willing	Yes	Yes	Yes	Yes	Neutral	Books or educational materials	Not collected in this dataset	Yes	No	No	0			FALSE	FALSE	FALSE	5
U-12	Urban	35-44	Male	Undergraduate Degree	1	Yes	Very comfortable	Very willing	Unsure	Yes	Yes	Yes	Very influential	General dentist	Not collected in this dataset	Yes	No	No	1	Yes	Named	TRUE	FALSE	FALSE	5
U-13	Urban	25-34	Non-binary	Undergraduate Degree	2	Yes	Somewhat comfortable	Very willing	Yes	Yes	Yes	Yes	Neutral	Internet	Not collected in this dataset	Yes	No	No	1	Yes	Named	FALSE	FALSE	TRUE	4
U-14	Urban	25-34	Female	Undergraduate Degree	3 and more	No	Very comfortable	Very willing	Yes	Yes	Yes	Yes	Neutral	Paediatric dentist, General dentist	Not collected in this dataset	Yes	No	No	0			TRUE	FALSE	FALSE	5
U-15	Urban	25-34	Female	Postgraduate Degree	3 and more	Yes	Very comfortable	Somewhat willing	No	Yes	No	Yes	Not very influential	General dentist	Not collected in this dataset	Yes	No	No	1	Yes	Named	TRUE	FALSE	FALSE	5
U-16	Urban	Under 25	Female	Undergraduate Degree	2	Yes	Neutral	Not very willing	No	Yes	Yes	Yes	Somewhat influential	Family and friends, Paediatric dentist, Internet	Not collected in this dataset	Yes	No	No	1	Yes	Named	TRUE	FALSE	TRUE	3
U-17	Urban	Under 25	Male	Undergraduate Degree	1	No	Very comfortable	Very willing	Yes	Yes	Yes	Yes	Neutral	Books or educational materials	Not collected in this dataset	Yes	No	No	0			FALSE	FALSE	FALSE	5
U-18	Urban	25-34	Female	Undergraduate Degree	1	No	Very comfortable	Very willing	Yes	Yes	Yes	No	Somewhat influential	Family and friends, Books or educational materials	Not collected in this dataset	Yes	No	No	0			FALSE	FALSE	FALSE	5
U-19	Urban	35-44	Female	Undergraduate Degree	3 and more	Yes	Very comfortable	Very willing	Yes	Yes	Yes	Yes	Somewhat influential	General dentist	Not collected in this dataset	Yes	No	No	1	Yes	Named	TRUE	FALSE	FALSE	5
U-20	Urban	Under 25	Female	PhD	0	No	Very comfortable	Very willing	Yes	Yes	Yes	No	Somewhat influential	Paediatric dentist	Not collected in this dataset	Yes	No	No	0			TRUE	FALSE	FALSE	5
U-21	Urban	Under 25	Female	Undergraduate Degree	2	No	Somewhat comfortable	Very willing	Yes	Yes	Yes	No	Not very influential	Family and friends	Not collected in this dataset	Yes	No	No	0			FALSE	FALSE	FALSE	4
U-22	Urban	Under 25	Female	Undergraduate Degree	2	Yes	Very comfortable	Neutral	Unsure	Yes	Yes	Yes	Somewhat influential	General dentist, Internet, Books or educational materials	Not collected in this dataset	Yes	No	No	1	Yes	Named	TRUE	FALSE	TRUE	5
U-23	Urban	25-34	Female	Undergraduate Degree	2	No	Somewhat comfortable	Very willing	No	Yes	Yes	No	Somewhat influential	General dentist, Books or educational materials	Not collected in this dataset	Yes	No	No	0			TRUE	FALSE	FALSE	4
U-24	Urban	25-34	Female	Undergraduate Degree	2	No	Very comfortable	Very willing	Yes	Yes	No	No	Neutral	General dentist	Not collected in this dataset	Yes	No	No	0			TRUE	FALSE	FALSE	5
U-25	Urban	25-34	Female	Undergraduate Degree	1	No	Very comfortable	Very willing	Unsure	Yes	Yes	Yes	Very influential	Paediatric dentist	Not collected in this dataset	Yes	No	No	0			TRUE	FALSE	FALSE	5
U-26	Urban	35-44	Male	Undergraduate Degree	1	Yes	Somewhat comfortable	Somewhat willing	Yes	Yes	Yes	No	Very influential	General dentist	Not collected in this dataset	Yes	No	No	1	Yes	Named	TRUE	FALSE	FALSE	4
U-27	Urban	35-44	Male	Undergraduate Degree	1	No	Neutral	Somewhat willing	No	Yes	Yes	No	Somewhat influential	Paediatric dentist, General dentist, Internet	Not collected in this dataset	Yes	No	No	0			TRUE	FALSE	TRUE	3
U-28	Urban	35-44	Female	Undergraduate Degree	1	No	Very comfortable	Neutral	Yes	Yes	Yes	No	Neutral	Paediatric dentist	Not collected in this dataset	Yes	No	No	0			TRUE	FALSE	FALSE	5
U-29	Urban	45-54	Male	Professional Degree	1	Yes	Very comfortable	Very willing	No	Yes	Yes	Yes	Very influential	Paediatric dentist, Internet	Not collected in this dataset	Yes	No	No	1	Yes	Named	TRUE	FALSE	TRUE	5
U-30	Urban	25-34	Female	Professional Degree	0	No	Very comfortable	Neutral	No	Yes	Yes	No	Somewhat influential	Books or educational materials	Not collected in this dataset	Yes	No	No	0			FALSE	FALSE	FALSE	5
U-31	Urban	Under 25	Male	Professional Degree	0	No	Very comfortable	Very willing	No	Yes	Yes	Yes	Very influential	Paediatric dentist, Internet	Not collected in this dataset	Yes	No	No	0			TRUE	FALSE	TRUE	5
U-32	Urban	45-54	Male	Professional Degree	2	No	Very comfortable	Very willing	No	Yes	Yes	No	Very influential	Paediatric dentist, Internet	Not collected in this dataset	Yes	No	No	0			TRUE	FALSE	TRUE	5
U-33	Urban	Under 25	Female	Postgraduate Degree	0	No	Very comfortable	Somewhat willing	Yes	Unsure	No	Yes	Very influential	Internet, Books or educational materials	Not collected in this dataset	Yes	No	No	0			FALSE	FALSE	TRUE	5
U-34	Urban	Under 25	Male	Undergraduate Degree	0	Yes	Very comfortable	Very willing	Yes	Yes	Yes	No	Not influential at all	Paediatric dentist	Not collected in this dataset	Yes	No	No	1	Yes	Named	TRUE	FALSE	FALSE	5
U-35	Urban	45-54	Male	Professional Degree	2	No	Somewhat comfortable	Very willing	Yes	Yes	Yes	No	Very influential	General dentist	Not collected in this dataset	Yes	No	No	0			TRUE	FALSE	FALSE	4
U-36	Urban	Under 25	Female	Undergraduate Degree	2	Yes	Very comfortable	Very willing	Yes	Yes	Yes	Yes	Neutral	Paediatric dentist, General dentist, Internet	Not collected in this dataset	Yes	No	No	1	Yes	Named	TRUE	FALSE	TRUE	5
U-37	Urban	Under 25	Male	Undergraduate Degree	3 and more	Yes	Somewhat comfortable	Very willing	No	Yes	Yes	Yes	Somewhat influential	General dentist	Not collected in this dataset	Yes	No	No	1	Yes	Named	TRUE	FALSE	FALSE	4
U-38	Urban	25-34	Female	Professional Degree	2	Yes	Very comfortable	Very willing	No	Yes	Yes	Yes	Neutral	General dentist	Not collected in this dataset	Yes	No	No	1	Yes	Named	TRUE	FALSE	FALSE	5
U-39	Urban	45-54	Female	Postgraduate Degree	2	No	Somewhat comfortable	Very willing	Yes	Yes	Yes	Yes	Neutral	Family and friends	Not collected in this dataset	Yes	No	No	0			FALSE	FALSE	FALSE	4
U-40	Urban	25-34	Female	Undergraduate Degree	2	No	Very comfortable	Not very willing	Unsure	Yes	Yes	No	Somewhat influential	Books or educational materials	Not collected in this dataset	Yes	No	No	0			FALSE	FALSE	FALSE	5
U-41	Urban	45-54	Female	Undergraduate Degree	2	Yes	Somewhat comfortable	Very willing	No	Yes	Yes	No	Somewhat influential	General dentist	Not collected in this dataset	Yes	No	No	1	Yes	Named	TRUE	FALSE	FALSE	4
U-42	Urban	25-34	Male	Undergraduate Degree	2	Yes	Very comfortable	Neutral	Yes	Yes	Yes	Yes	Neutral	Books or educational materials	Not collected in this dataset	Yes	No	No	1	Yes	Named	FALSE	FALSE	FALSE	5
U-43	Urban	Under 25	Male	Undergraduate Degree	2	Yes	Very comfortable	Neutral	No	Yes	Yes	Yes	Somewhat influential	Internet	Not collected in this dataset	Yes	No	No	1	Yes	Named	FALSE	FALSE	TRUE	5
U-44	Urban	35-44	Female	Undergraduate Degree	2	No	Very comfortable	Very willing	Yes	Yes	Yes	No	Somewhat influential	Books or educational materials	Not collected in this dataset	Yes	No	No	0			FALSE	FALSE	FALSE	5
U-45	Urban	35-44	Male	PhD	2	Yes	Very comfortable	Not very willing	No	Yes	Yes	No	Somewhat influential	General dentist, Books or educational materials	Not collected in this dataset	Yes	No	No	1	Yes	Named	TRUE	FALSE	FALSE	5
U-46	Urban	35-44	Female	Undergraduate Degree	0	No	Somewhat comfortable	Not very willing	Yes	Yes	Yes	Yes	Neutral	General dentist	Not collected in this dataset	Yes	No	No	0			TRUE	FALSE	FALSE	4
U-47	Urban	Under 25	Female	Undergraduate Degree	3 and more	No	Somewhat comfortable	Not very willing	No	Yes	Yes	Yes	Somewhat influential	General dentist	Not collected in this dataset	Yes	No	No	0			TRUE	FALSE	FALSE	4
U-48	Urban	35-44	Female	Postgraduate Degree	0	No	Very comfortable	Very willing	Yes	Yes	Yes	Yes	Very influential	Internet	Not collected in this dataset	Yes	No	No	0			FALSE	FALSE	TRUE	5
U-49	Urban	25-34	Female	Undergraduate Degree	2	No	Very comfortable	Not very willing	Yes	Yes	No	No	Neutral	Family and friends	Not collected in this dataset	Yes	No	No	0			FALSE	FALSE	FALSE	5
U-50	Urban	35-44	Female	Undergraduate Degree	0	Yes	Very comfortable	Not very willing	Yes	Yes	Yes	No	Somewhat influential	Family and friends, General dentist, Internet	Not collected in this dataset	Yes	No	No	1	Yes	Named	TRUE	FALSE	TRUE	5
U-51	Urban	45-54	Male	Undergraduate Degree	0	No	Very comfortable	Neutral	Yes	Yes	Yes	No	Very influential	General dentist	Not collected in this dataset	No	Yes	No	0			TRUE	FALSE	FALSE	5
U-52	Urban	25-34	Female	Undergraduate Degree	2	No	Very comfortable	Very willing	Yes	Yes	Yes	Yes	Somewhat influential	Internet	Not collected in this dataset	No	Yes	No	0			FALSE	FALSE	TRUE	5
U-53	Urban	45-54	Female	Undergraduate Degree	1	Yes	Very comfortable	Very willing	Yes	Yes	No	No	Somewhat influential	Family and friends	Not collected in this dataset	No	Yes	No	1	Yes	Named	FALSE	FALSE	FALSE	5
U-54	Urban	35-44	Female	Undergraduate Degree	1	No	Very comfortable	Very willing	No	Yes	Yes	No	Neutral	Family and friends	Not collected in this dataset	No	Yes	No	0			FALSE	FALSE	FALSE	5
U-55	Urban	25-34	Female	Undergraduate Degree	0	No	Very comfortable	Very willing	Yes	Yes	Yes	No	Somewhat influential	General dentist	Not collected in this dataset	No	Yes	No	0			TRUE	FALSE	FALSE	5
U-56	Urban	45-54	Male	Undergraduate Degree	2	No	Very comfortable	Very willing	Yes	Yes	Yes	No	Not very influential	Paediatric dentist	Not collected in this dataset	No	Yes	No	0			TRUE	FALSE	FALSE	5
U-57	Urban	45-54	Female	Postgraduate Degree	1	Yes	Very comfortable	Very willing	Unsure	Yes	No	Yes	Neutral	Paediatric dentist, General dentist, Books or educational materials	Not collected in this dataset	No	Yes	No	1	Yes	Named	TRUE	FALSE	FALSE	5
U-58	Urban	25-34	Female	Undergraduate Degree	0	No	Somewhat comfortable	Neutral	Yes	Yes	No	No	Somewhat influential	Internet	Not collected in this dataset	No	Yes	No	0			FALSE	FALSE	TRUE	4
U-59	Urban	35-44	Female	Undergraduate Degree	2	No	Somewhat comfortable	Not very willing	No	Yes	Yes	Yes	Neutral	Family and friends, General dentist	Not collected in this dataset	No	Yes	No	0			TRUE	FALSE	FALSE	4
U-60	Urban	35-44	Female	Undergraduate Degree	0	No	Very comfortable	Very willing	No	Yes	Yes	Yes	Not very influential	Internet	Not collected in this dataset	No	Yes	No	0			FALSE	FALSE	TRUE	5
U-61	Urban	Under 25	Male	Undergraduate Degree	2	No	Very comfortable	Not very willing	Unsure	Yes	Yes	No	Very influential	Paediatric dentist, Books or educational materials	Not collected in this dataset	No	Yes	No	0			TRUE	FALSE	FALSE	5
U-62	Urban	25-34	Female	Undergraduate Degree	0	No	Very comfortable	Very willing	Unsure	Yes	Yes	No	Very influential	Paediatric dentist	Not collected in this dataset	No	Yes	No	0			TRUE	FALSE	FALSE	5
U-63	Urban	25-34	Female	Undergraduate Degree	1	No	Somewhat comfortable	Very willing	Yes	Yes	No	No	Somewhat influential	Paediatric dentist, General dentist, Internet	Not collected in this dataset	No	Yes	No	0			TRUE	FALSE	TRUE	4
U-64	Urban	45-54	Female	Undergraduate Degree	0	No	Very comfortable	Very willing	Yes	Yes	No	No	Somewhat influential	General dentist	Not collected in this dataset	No	Yes	No	0			TRUE	FALSE	FALSE	5
U-65	Urban	35-44	Female	Undergraduate Degree	2	No	Very comfortable	Not willing at all	Unsure	Yes	Yes	No	Neutral	Books or educational materials	Not collected in this dataset	No	Yes	No	0			FALSE	FALSE	FALSE	5
U-66	Urban	Under 25	Female	Undergraduate Degree	1	No	Very comfortable	Not willing at all	No	Yes	No	Yes	Somewhat influential	General dentist, Internet	Not collected in this dataset	No	Yes	No	0			TRUE	FALSE	TRUE	5
U-67	Urban	25-34	Male	Undergraduate Degree	2	Yes	Very comfortable	Very willing	No	Yes	Yes	Yes	Very influential	General dentist, Internet	Not collected in this dataset	No	Yes	No	1	Yes	Named	TRUE	FALSE	TRUE	5
U-68	Urban	Under 25	Female	Postgraduate Degree	1	Yes	Very comfortable	Very willing	No	Yes	Yes	No	Not very influential	Paediatric dentist	Not collected in this dataset	No	Yes	No	1	Yes	Named	TRUE	FALSE	FALSE	5
U-69	Urban	25-34	Female	Undergraduate Degree	2	Yes	Very comfortable	Very willing	Yes	Yes	No	No	Somewhat influential	Paediatric dentist	Not collected in this dataset	No	Yes	No	1	Yes	Named	TRUE	FALSE	FALSE	5
U-70	Urban	25-34	Female	Postgraduate Degree	2	Yes	Somewhat comfortable	Neutral	Yes	Yes	Yes	No	Very influential	Family and friends, Paediatric dentist, Internet	Not collected in this dataset	No	Yes	No	1	Yes	Named	TRUE	FALSE	TRUE	4
U-71	Urban	25-34	Male	Undergraduate Degree	0	No	Very comfortable	Very willing	No	Yes	No	No	Very influential	Internet	Not collected in this dataset	No	Yes	No	0			FALSE	FALSE	TRUE	5
U-72	Urban	Under 25	Female	Postgraduate Degree	2	No	Very comfortable	Very willing	No	Yes	No	No	Somewhat influential	General dentist	Not collected in this dataset	No	Yes	No	0			TRUE	FALSE	FALSE	5
U-73	Urban	45-54	Male	Postgraduate Degree	1	Yes	Very comfortable	Not willing at all	Yes	Yes	Yes	No	Very influential	General dentist	Not collected in this dataset	No	Yes	No	1	Yes	Named	TRUE	FALSE	FALSE	5
U-74	Urban	Under 25	Male	Professional Degree	0	No	Very comfortable	Not willing at all	No	Yes	Yes	No	Neutral	Paediatric dentist, General dentist	Not collected in this dataset	No	Yes	No	0			TRUE	FALSE	FALSE	5
U-75	Urban	Under 25	Female	Undergraduate Degree	0	No	Very comfortable	Neutral	Yes	Yes	Yes	Yes	Somewhat influential	Paediatric dentist, General dentist, Internet	Not collected in this dataset	No	Yes	No	0			TRUE	FALSE	TRUE	5
U-76	Urban	45-54	Female	Undergraduate Degree	1	Yes	Very comfortable	Very willing	Unsure	Yes	Yes	Yes	Somewhat influential	Paediatric dentist, General dentist	Not collected in this dataset	No	Yes	No	1	Yes	Named	TRUE	FALSE	FALSE	5
U-77	Urban	35-44	Female	Undergraduate Degree	1	No	Somewhat comfortable	Somewhat willing	Unsure	Yes	Yes	No	Very influential	Paediatric dentist	Not collected in this dataset	No	Yes	No	0			TRUE	FALSE	FALSE	4
U-78	Urban	Under 25	Female	Undergraduate Degree	0	Yes	Very comfortable	Very willing	Yes	Yes	Yes	No	Somewhat influential	General dentist	Not collected in this dataset	No	Yes	No	1	Yes	Named	TRUE	FALSE	FALSE	5
U-79	Urban	25-34	Female	Undergraduate Degree	0	No	Very comfortable	Neutral	Yes	Yes	Yes	Yes	Not very influential	Family and friends, Paediatric dentist, General dentist	Not collected in this dataset	No	Yes	No	0			TRUE	FALSE	FALSE	5
U-80	Urban	45-54	Male	Undergraduate Degree	0	No	Very comfortable	Somewhat willing	No	Yes	Yes	Yes	Neutral	General dentist	Not collected in this dataset	No	Yes	No	0			TRUE	FALSE	FALSE	5
U-81	Urban	45-54	Female	Undergraduate Degree	0	No	Somewhat comfortable	Very willing	Yes	Yes	Yes	Yes	Very influential	Paediatric dentist, General dentist, Internet, Books or educational materials	Not collected in this dataset	No	Yes	No	0			TRUE	FALSE	TRUE	4
U-82	Urban	Under 25	Female	Professional Degree	3 and more	No	Very comfortable	Very willing	Unsure	Yes	Yes	Yes	Neutral	General dentist	Not collected in this dataset	No	Yes	No	0			TRUE	FALSE	FALSE	5
U-83	Urban	25-34	Female	PhD	0	Yes	Very comfortable	Very willing	No	Yes	No	No	Neutral	Family and friends	Not collected in this dataset	No	Yes	No	1	Yes	Named	FALSE	FALSE	FALSE	5
U-84	Urban	25-34	Female	Undergraduate Degree	1	Yes	Very comfortable	Very willing	No	Yes	Yes	No	Very influential	Internet	Not collected in this dataset	No	Yes	No	1	Yes	Named	FALSE	FALSE	TRUE	5
U-85	Urban	Under 25	Female	Professional Degree	2	No	Very comfortable	Very willing	Yes	Yes	Yes	No	Somewhat influential	Internet	Not collected in this dataset	No	Yes	No	0			FALSE	FALSE	TRUE	5
U-86	Urban	25-34	Female	Postgraduate Degree	1	No	Very comfortable	Very willing	Unsure	Yes	Yes	Yes	Somewhat influential	General dentist	Not collected in this dataset	No	Yes	No	0			TRUE	FALSE	FALSE	5
U-87	Urban	25-34	Female	Undergraduate Degree	2	Yes	Very comfortable	Not very willing	No	Yes	Yes	No	Neutral	General dentist	Not collected in this dataset	No	Yes	No	1	Yes	Named	TRUE	FALSE	FALSE	5
U-88	Urban	45-54	Female	Postgraduate Degree	2	No	Very comfortable	Very willing	No	Yes	Yes	No	Neutral	Family and friends, General dentist	Not collected in this dataset	No	Yes	No	0			TRUE	FALSE	FALSE	5
U-89	Urban	45-54	Female	Undergraduate Degree	0	No	Very comfortable	Somewhat willing	No	Yes	Yes	No	Somewhat influential	Paediatric dentist, General dentist	Not collected in this dataset	No	Yes	No	0			TRUE	FALSE	FALSE	5
U-90	Urban	25-34	Male	Undergraduate Degree	1	Yes	Very comfortable	Neutral	Yes	Unsure	Yes	No	Very influential	Paediatric dentist, General dentist	Not collected in this dataset	No	Yes	No	1	Yes	None	TRUE	FALSE	FALSE	5
U-91	Urban	35-44	Female	Undergraduate Degree	0	No	Very comfortable	Not willing at all	Yes	Yes	Yes	Yes	Somewhat influential	General dentist, Internet	Not collected in this dataset	No	Yes	No	0			TRUE	FALSE	TRUE	5
U-92	Urban	25-34	Female	Postgraduate Degree	1	Yes	Very comfortable	Very willing	No	Yes	No	No	Somewhat influential	General dentist	Not collected in this dataset	No	Yes	No	1	Yes	None	TRUE	FALSE	FALSE	5
U-93	Urban	25-34	Female	Professional Degree	2	No	Very comfortable	Not very willing	Yes	Yes	Yes	No	Somewhat influential	General dentist	Not collected in this dataset	No	Yes	No	0			TRUE	FALSE	FALSE	5
U-94	Urban	25-34	Female	Undergraduate Degree	1	No	Very comfortable	Somewhat willing	Yes	Yes	No	No	Very influential	General dentist, Internet	Not collected in this dataset	No	Yes	No	0			TRUE	FALSE	TRUE	5
U-95	Urban	25-34	Female	PhD	2	No	Very comfortable	Neutral	Yes	Unsure	Yes	Yes	Somewhat influential	Family and friends	Not collected in this dataset	No	Yes	No	0			FALSE	FALSE	FALSE	5
U-96	Urban	45-54	Female	Undergraduate Degree	1	No	Very comfortable	Neutral	Yes	Yes	Yes	No	Not very influential	Internet	Not collected in this dataset	No	Yes	No	0			FALSE	FALSE	TRUE	5
U-97	Urban	25-34	Male	Undergraduate Degree	1	Yes	Very comfortable	Neutral	Yes	Yes	Yes	Yes	Not very influential	Paediatric dentist, Internet	Not collected in this dataset	No	Yes	No	1	Yes	None	TRUE	FALSE	TRUE	5
U-98	Urban	45-54	Male	Professional Degree	1	Yes	Very comfortable	Not very willing	Yes	Yes	No	Yes	Somewhat influential	Family and friends, General dentist, Internet	Not collected in this dataset	No	Yes	No	1	Yes	None	TRUE	FALSE	TRUE	5
U-99	Urban	45-54	Female	PhD	1	No	Very comfortable	Very willing	Yes	Unsure	Yes	Yes	Somewhat influential	Family and friends, General dentist	Not collected in this dataset	No	Yes	No	0			TRUE	FALSE	FALSE	5
U-100	Urban	25-34	Female	Professional Degree	0	No	Very comfortable	Not very willing	Yes	Yes	No	No	Somewhat influential	Paediatric dentist, General dentist	Not collected in this dataset	No	Yes	No	0			TRUE	FALSE	FALSE	5
U-101	Urban	35-44	Female	Undergraduate Degree	1	No	Neutral	Very willing	No	Yes	Yes	No	Neutral	Books or educational materials	Not collected in this dataset	No	Yes	No	0			FALSE	FALSE	FALSE	3
U-102	Urban	25-34	Female	Undergraduate Degree	1	No	Very comfortable	Neutral	No	Yes	Yes	No	Neutral	Paediatric dentist	Not collected in this dataset	No	Yes	No	0			TRUE	FALSE	FALSE	5
U-103	Urban	Under 25	Female	Postgraduate Degree	2	No	Neutral	Very willing	No	Yes	Yes	Yes	Very influential	General dentist	Not collected in this dataset	No	Yes	No	0			TRUE	FALSE	FALSE	3
U-104	Urban	Under 25	Female	Undergraduate Degree	1	Yes	Very comfortable	Neutral	Yes	Yes	Yes	No	Very influential	General dentist, Books or educational materials	Not collected in this dataset	No	Yes	No	1	Yes	None	TRUE	FALSE	FALSE	5
U-105	Urban	25-34	Female	Professional Degree	0	No	Very comfortable	Not willing at all	Yes	Yes	No	No	Somewhat influential	General dentist	Not collected in this dataset	No	Yes	No	0			TRUE	FALSE	FALSE	5
U-106	Urban	35-44	Female	Postgraduate Degree	3 and more	Yes	Somewhat comfortable	Not willing at all	No	Yes	No	Yes	Somewhat influential	Internet, Books or educational materials	Not collected in this dataset	No	Yes	No	1	Yes	None	FALSE	FALSE	TRUE	4
U-107	Urban	25-34	Female	Postgraduate Degree	2	No	Very comfortable	Very willing	Yes	Yes	No	No	Not very influential	Family and friends, Books or educational materials	Not collected in this dataset	No	Yes	No	0			FALSE	FALSE	FALSE	5
U-108	Urban	35-44	Female	Undergraduate Degree	1	Yes	Very comfortable	Somewhat willing	No	Yes	Yes	No	Somewhat influential	General dentist	Not collected in this dataset	No	Yes	No	1	Yes	None	TRUE	FALSE	FALSE	5
U-109	Urban	35-44	Female	PhD	0	No	Very comfortable	Very willing	No	Yes	Yes	No	Very influential	General dentist	Not collected in this dataset	No	Yes	No	0			TRUE	FALSE	FALSE	5
U-110	Urban	35-44	Non-binary	Undergraduate Degree	2	No	Very comfortable	Very willing	Yes	Yes	No	Yes	Somewhat influential	Family and friends	Not collected in this dataset	No	Yes	No	0			FALSE	FALSE	FALSE	5
U-111	Urban	45-54	Female	Undergraduate Degree	1	Yes	Very comfortable	Neutral	No	Yes	No	Yes	Somewhat influential	Books or educational materials	Not collected in this dataset	No	Yes	No	1	Yes	None	FALSE	FALSE	FALSE	5
U-112	Urban	25-34	Female	PhD	2	No	Very comfortable	Very willing	Unsure	Yes	Yes	Yes	Neutral	General dentist	Not collected in this dataset	No	Yes	No	0			TRUE	FALSE	FALSE	5
U-113	Urban	25-34	Female	Postgraduate Degree	0	No	Very comfortable	Very willing	No	Yes	Yes	Yes	Very influential	Family and friends	Not collected in this dataset	No	Yes	No	0			FALSE	FALSE	FALSE	5
U-114	Urban	45-54	Male	Undergraduate Degree	2	No	Very comfortable	Neutral	Yes	Yes	Yes	No	Not very influential	Paediatric dentist	Not collected in this dataset	No	Yes	No	0			TRUE	FALSE	FALSE	5
U-115	Urban	Under 25	Female	Postgraduate Degree	1	Yes	Somewhat uncomfortable	Neutral	No	Yes	Yes	No	Not very influential	Internet	Not collected in this dataset	No	Yes	No	1	Yes	None	FALSE	FALSE	TRUE	2
U-116	Urban	25-34	Female	Postgraduate Degree	1	Yes	Very comfortable	Very willing	Yes	Yes	Yes	Yes	Neutral	General dentist	Not collected in this dataset	No	Yes	No	1	Yes	None	TRUE	FALSE	FALSE	5
U-117	Urban	25-34	Female	Postgraduate Degree	0	Yes	Neutral	Very willing	No	Yes	Yes	Yes	Not very influential	Family and friends, Paediatric dentist	Not collected in this dataset	No	Yes	No	1	Yes	None	TRUE	FALSE	FALSE	3
U-118	Urban	Under 25	Female	Undergraduate Degree	2	Yes	Very comfortable	Neutral	Yes	Yes	Yes	No	Very influential	Books or educational materials	Not collected in this dataset	No	Yes	No	1	Yes	None	FALSE	FALSE	FALSE	5
U-119	Urban	25-34	Male	Undergraduate Degree	2	No	Very comfortable	Neutral	Yes	Yes	Yes	Yes	Somewhat influential	Internet	Not collected in this dataset	No	Yes	No	0			FALSE	FALSE	TRUE	5
U-120	Urban	25-34	Female	Undergraduate Degree	1	Yes	Very comfortable	Neutral	Yes	Yes	Yes	No	Somewhat influential	Paediatric dentist, General dentist	Not collected in this dataset	No	Yes	No	1	Yes	None	TRUE	FALSE	FALSE	5
U-121	Urban	45-54	Female	Undergraduate Degree	0	No	Very comfortable	Very willing	Yes	Yes	Yes	Yes	Somewhat influential	Books or educational materials	Not collected in this dataset	No	Yes	No	0			FALSE	FALSE	FALSE	5
U-122	Urban	35-44	Female	Undergraduate Degree	1	Yes	Very comfortable	Not willing at all	Yes	Yes	Yes	Yes	Not very influential	General dentist	Not collected in this dataset	No	Yes	No	1	Yes	None	TRUE	FALSE	FALSE	5
U-123	Urban	Under 25	Female	PhD	1	Yes	Neutral	Very willing	Yes	Yes	Yes	No	Neutral	General dentist	Not collected in this dataset	No	Yes	No	1	Yes	None	TRUE	FALSE	FALSE	3
U-124	Urban	35-44	Female	Undergraduate Degree	2	Yes	Somewhat comfortable	Very willing	Yes	Yes	Yes	No	Very influential	Family and friends, Paediatric dentist, Internet	Not collected in this dataset	No	Yes	No	1	Yes	None	TRUE	FALSE	TRUE	4
U-125	Urban	35-44	Female	Postgraduate Degree	1	No	Neutral	Neutral	No	Yes	Yes	No	Somewhat influential	General dentist, Internet	Not collected in this dataset	No	Yes	No	0			TRUE	FALSE	TRUE	3
U-126	Urban	45-54	Male	Undergraduate Degree	1	No	Very comfortable	Not willing at all	No	Yes	Yes	No	Somewhat influential	Internet, Books or educational materials	Not collected in this dataset	No	Yes	No	0			FALSE	FALSE	TRUE	5
U-127	Urban	45-54	Non-binary	Professional Degree	0	Yes	Very comfortable	Not very willing	No	Yes	Yes	Yes	Not influential at all	General dentist, Internet	Not collected in this dataset	No	Yes	No	1	Yes	None	TRUE	FALSE	TRUE	5
U-128	Urban	25-34	Male	Undergraduate Degree	1	Yes	Very comfortable	Neutral	No	Yes	Yes	Yes	Very influential	Family and friends	Not collected in this dataset	No	Yes	No	1	Yes	None	FALSE	FALSE	FALSE	5
U-129	Urban	45-54	Female	Postgraduate Degree	0	Yes	Very comfortable	Neutral	Yes	Yes	No	Yes	Somewhat influential	General dentist, Books or educational materials	Not collected in this dataset	No	Yes	No	1	Yes	None	TRUE	FALSE	FALSE	5
U-130	Urban	35-44	Male	Postgraduate Degree	0	No	Neutral	Very willing	No	Yes	No	No	Very influential	Family and friends	Not collected in this dataset	No	No	No	0			FALSE	FALSE	FALSE	3
U-131	Urban	35-44	Female	Undergraduate Degree	0	No	Very comfortable	Not very willing	Yes	Yes	No	No	Neutral	Paediatric dentist, Internet, Books or educational materials	Not collected in this dataset	No	No	No	0			TRUE	FALSE	TRUE	5
U-132	Urban	45-54	Female	Undergraduate Degree	0	No	Very comfortable	Not very willing	Unsure	Yes	Yes	Yes	Not influential at all	General dentist	Not collected in this dataset	No	No	No	0			TRUE	FALSE	FALSE	5
U-133	Urban	25-34	Female	Professional Degree	1	No	Very comfortable	Neutral	No	Yes	Yes	No	Somewhat influential	General dentist	Not collected in this dataset	No	No	No	0			TRUE	FALSE	FALSE	5
U-134	Urban	45-54	Male	Undergraduate Degree	2	Yes	Somewhat uncomfortable	Not willing at all	Yes	Yes	Yes	Yes	Neutral	Paediatric dentist, General dentist	Not collected in this dataset	No	No	No	1	Yes	None	TRUE	FALSE	FALSE	2
U-135	Urban	25-34	Female	Undergraduate Degree	2	Yes	Very comfortable	Very willing	No	Yes	Yes	Yes	Neutral	General dentist, Internet	Not collected in this dataset	No	No	No	1	Yes	None	TRUE	FALSE	TRUE	5
U-136	Urban	35-44	Female	Undergraduate Degree	0	No	Very comfortable	Neutral	Yes	Yes	Yes	Yes	Somewhat influential	Paediatric dentist	Not collected in this dataset	No	No	No	0			TRUE	FALSE	FALSE	5
U-137	Urban	25-34	Female	Undergraduate Degree	0	No	Very comfortable	Very willing	Unsure	Yes	No	Yes	Somewhat influential	Internet	Not collected in this dataset	No	No	No	0			FALSE	FALSE	TRUE	5
U-138	Urban	25-34	Female	Undergraduate Degree	1	No	Neutral	Very willing	Yes	Yes	No	Yes	Neutral	Internet	Not collected in this dataset	No	No	No	0			FALSE	FALSE	TRUE	3
U-139	Urban	45-54	Female	Undergraduate Degree	1	No	Very comfortable	Somewhat willing	No	Yes	Yes	No	Somewhat influential	Internet	Not collected in this dataset	No	No	No	0			FALSE	FALSE	TRUE	5
U-140	Urban	45-54	Female	Undergraduate Degree	1	No	Very comfortable	Not very willing	Yes	Yes	No	No	Neutral	Paediatric dentist, Internet	Not collected in this dataset	No	No	No	0			TRUE	FALSE	TRUE	5
U-141	Urban	Under 25	Male	Undergraduate Degree	2	No	Very comfortable	Very willing	Unsure	Yes	No	No	Neutral	Books or educational materials	Not collected in this dataset	No	No	No	0			FALSE	FALSE	FALSE	5
U-142	Urban	25-34	Female	Postgraduate Degree	2	Yes	Somewhat comfortable	Neutral	Yes	Yes	Yes	Yes	Neutral	Books or educational materials	Not collected in this dataset	No	No	No	1	Yes	None	FALSE	FALSE	FALSE	4
U-143	Urban	Under 25	Female	Undergraduate Degree	3 and more	Yes	Very comfortable	Neutral	Yes	Yes	No	Yes	Neutral	Internet	Not collected in this dataset	No	No	No	1	Yes	None	FALSE	FALSE	TRUE	5
U-144	Urban	25-34	Male	Undergraduate Degree	0	Yes	Very comfortable	Neutral	No	Yes	Yes	Yes	Somewhat influential	Family and friends, Paediatric dentist, General dentist	Not collected in this dataset	No	No	No	1	Yes	None	TRUE	FALSE	FALSE	5
U-145	Urban	25-34	Male	Postgraduate Degree	0	No	Neutral	Very willing	Unsure	Yes	No	No	Somewhat influential	General dentist, Internet	Not collected in this dataset	No	No	No	0			TRUE	FALSE	TRUE	3
U-146	Urban	Under 25	Female	Undergraduate Degree	1	Yes	Very comfortable	Neutral	Yes	Yes	Yes	No	Somewhat influential	Family and friends	Not collected in this dataset	No	No	No	1	Yes	None	FALSE	FALSE	FALSE	5
U-147	Urban	35-44	Female	Postgraduate Degree	1	No	Very comfortable	Very willing	Yes	Yes	Yes	Yes	Not influential at all	General dentist	Not collected in this dataset	No	No	No	0			TRUE	FALSE	FALSE	5
U-148	Urban	25-34	Male	Postgraduate Degree	1	No	Very comfortable	Very willing	Yes	Yes	Yes	No	Somewhat influential	Paediatric dentist	Not collected in this dataset	No	No	No	0			TRUE	FALSE	FALSE	5
U-149	Urban	35-44	Female	Professional Degree	2	No	Very comfortable	Neutral	Unsure	Yes	No	Yes	Somewhat influential	Paediatric dentist, General dentist	Not collected in this dataset	No	No	No	0			TRUE	FALSE	FALSE	5
U-150	Urban	25-34	Female	Undergraduate Degree	0	Yes	Very comfortable	Very willing	No	Yes	Yes	Yes	Somewhat influential	General dentist	Not collected in this dataset	No	No	No	1	Yes	None	TRUE	FALSE	FALSE	5
U-151	Urban	45-54	Female	Undergraduate Degree	1	No	Very comfortable	Neutral	Yes	Yes	Yes	Yes	Somewhat influential	Family and friends, General dentist	Not collected in this dataset	No	No	No	0			TRUE	FALSE	FALSE	5
U-152	Urban	35-44	Female	Professional Degree	0	Yes	Very comfortable	Very willing	Yes	Yes	Yes	No	Somewhat influential	Family and friends	Not collected in this dataset	No	No	No	1	Yes	None	FALSE	FALSE	FALSE	5
U-153	Urban	25-34	Male	Undergraduate Degree	2	No	Very comfortable	Not very willing	Unsure	Yes	Yes	No	Neutral	General dentist	Not collected in this dataset	No	No	No	0			TRUE	FALSE	FALSE	5
U-154	Urban	Under 25	Female	Undergraduate Degree	0	No	Very comfortable	Very willing	Yes	Yes	Yes	No	Neutral	Family and friends	Not collected in this dataset	No	No	No	0			FALSE	FALSE	FALSE	5
U-155	Urban	Under 25	Female	Professional Degree	0	Yes	Very comfortable	Neutral	Unsure	Yes	Yes	Yes	Not very influential	Paediatric dentist	Not collected in this dataset	No	No	No	1	Yes	None	TRUE	FALSE	FALSE	5
U-156	Urban	25-34	Female	Undergraduate Degree	2	Yes	Very comfortable	Somewhat willing	No	Yes	Yes	No	Somewhat influential	Paediatric dentist, Internet	Not collected in this dataset	No	No	No	1	Yes	None	TRUE	FALSE	TRUE	5
U-157	Urban	Under 25	Female	Postgraduate Degree	1	No	Very comfortable	Neutral	Yes	Yes	Yes	No	Very influential	General dentist	Not collected in this dataset	No	No	No	0			TRUE	FALSE	FALSE	5
U-158	Urban	25-34	Female	Postgraduate Degree	0	Yes	Somewhat comfortable	Not very willing	Yes	Yes	Yes	No	Very influential	General dentist, Books or educational materials	Not collected in this dataset	No	No	No	1	Yes	None	TRUE	FALSE	FALSE	4
U-159	Urban	Under 25	Female	Postgraduate Degree	2	No	Very comfortable	Not willing at all	Yes	Yes	No	No	Very influential	Paediatric dentist, General dentist	Not collected in this dataset	No	No	No	0			TRUE	FALSE	FALSE	5
U-160	Urban	25-34	Female	Undergraduate Degree	1	No	Very comfortable	Not very willing	No	Yes	No	No	Somewhat influential	Paediatric dentist, General dentist	Not collected in this dataset	No	No	No	0			TRUE	FALSE	FALSE	5
U-161	Urban	45-54	Male	Undergraduate Degree	3 and more	No	Very comfortable	Neutral	Unsure	Yes	Yes	No	Not influential at all	Paediatric dentist	Not collected in this dataset	No	No	No	0			TRUE	FALSE	FALSE	5
U-162	Urban	35-44	Female	Postgraduate Degree	1	No	Very comfortable	Neutral	Yes	Yes	Yes	No	Very influential	Paediatric dentist	Not collected in this dataset	No	No	No	0			TRUE	FALSE	FALSE	5
U-163	Urban	35-44	Male	Postgraduate Degree	1	No	Very comfortable	Not willing at all	No	Yes	Yes	Yes	Very influential	Internet	Not collected in this dataset	No	No	No	0			FALSE	FALSE	TRUE	5
U-164	Urban	Under 25	Male	Undergraduate Degree	0	No	Somewhat comfortable	Somewhat willing	No	Yes	Yes	Yes	Very influential	Paediatric dentist	Not collected in this dataset	No	No	No	0			TRUE	FALSE	FALSE	4
U-165	Urban	45-54	Female	Undergraduate Degree	1	No	Very comfortable	Neutral	No	Yes	Yes	Yes	Not very influential	Paediatric dentist, General dentist	Not collected in this dataset	No	No	No	0			TRUE	FALSE	FALSE	5
U-166	Urban	25-34	Female	Undergraduate Degree	0	Yes	Very comfortable	Very willing	Yes	Yes	Yes	Yes	Somewhat influential	Family and friends	Not collected in this dataset	No	No	No	1	Yes	None	FALSE	FALSE	FALSE	5
U-167	Urban	Under 25	Female	Undergraduate Degree	2	No	Neutral	Very willing	No	Yes	Yes	Yes	Somewhat influential	Paediatric dentist, General dentist, Internet	Not collected in this dataset	No	No	No	0			TRUE	FALSE	TRUE	3
U-168	Urban	35-44	Female	Undergraduate Degree	1	Yes	Very comfortable	Neutral	No	Yes	Yes	Yes	Very influential	General dentist	Not collected in this dataset	No	No	No	1	No	None	TRUE	FALSE	FALSE	5
U-169	Urban	45-54	Non-binary	Professional Degree	1	Yes	Neutral	Very willing	Yes	No	Yes	No	Very influential	Paediatric dentist, General dentist	Not collected in this dataset	No	No	No	1	No	None	TRUE	FALSE	FALSE	3
U-170	Urban	35-44	Female	Undergraduate Degree	3 and more	Yes	Very comfortable	Very willing	Yes	Yes	Yes	No	Somewhat influential	Books or educational materials	Not collected in this dataset	No	No	No	1	No	None	FALSE	FALSE	FALSE	5
U-171	Urban	35-44	Male	Professional Degree	3 and more	No	Very comfortable	Not very willing	Yes	Yes	Yes	No	Not influential at all	Internet	Not collected in this dataset	No	No	No	0			FALSE	FALSE	TRUE	5
U-172	Urban	Under 25	Female	Postgraduate Degree	0	No	Very comfortable	Very willing	Yes	Yes	Yes	Yes	Very influential	General dentist	Not collected in this dataset	No	No	No	0			TRUE	FALSE	FALSE	5
U-173	Urban	Under 25	Female	Undergraduate Degree	2	No	Very comfortable	Somewhat willing	Unsure	Yes	Yes	No	Very influential	Family and friends, General dentist	Not collected in this dataset	No	No	No	0			TRUE	FALSE	FALSE	5
U-174	Urban	Under 25	Male	Postgraduate Degree	0	No	Somewhat comfortable	Very willing	No	Yes	Yes	Yes	Neutral	Family and friends	Not collected in this dataset	No	No	No	0			FALSE	FALSE	FALSE	4
U-175	Urban	25-34	Female	Undergraduate Degree	1	No	Neutral	Neutral	Yes	Yes	No	Yes	Neutral	Paediatric dentist	Not collected in this dataset	No	No	No	0			TRUE	FALSE	FALSE	3
U-176	Urban	45-54	Female	Undergraduate Degree	1	No	Very comfortable	Very willing	Yes	Yes	Yes	No	Somewhat influential	Family and friends, Paediatric dentist	Not collected in this dataset	No	No	No	0			TRUE	FALSE	FALSE	5
U-177	Urban	45-54	Male	Undergraduate Degree	0	Yes	Very comfortable	Very willing	No	Yes	Yes	Yes	Very influential	General dentist	Not collected in this dataset	No	No	No	1	No	None	TRUE	FALSE	FALSE	5
U-178	Urban	Under 25	Female	Undergraduate Degree	2	Yes	Very comfortable	Not very willing	Unsure	Yes	Yes	Yes	Very influential	Family and friends, General dentist	Not collected in this dataset	No	No	No	1	No	None	TRUE	FALSE	FALSE	5
U-179	Urban	45-54	Male	Undergraduate Degree	2	Yes	Somewhat comfortable	Very willing	No	Yes	Yes	Yes	Not very influential	Internet	Not collected in this dataset	No	No	No	1	No	None	FALSE	FALSE	TRUE	4
U-180	Urban	Under 25	Female	Postgraduate Degree	2	No	Very comfortable	Neutral	Yes	Yes	Yes	Yes	Very influential	Books or educational materials	Not collected in this dataset	No	No	No	0			FALSE	FALSE	FALSE	5
U-181	Urban	45-54	Female	Undergraduate Degree	1	No	Very comfortable	Very willing	No	Yes	No	Yes	Very influential	Books or educational materials	Not collected in this dataset	No	No	No	0			FALSE	FALSE	FALSE	5
U-182	Urban	25-34	Female	Professional Degree	2	Yes	Very comfortable	Very willing	No	Yes	Yes	Yes	Neutral	Paediatric dentist, General dentist, Internet	Not collected in this dataset	No	No	No	1	No	None	TRUE	FALSE	TRUE	5
U-183	Urban	45-54	Female	Undergraduate Degree	0	No	Very comfortable	Not very willing	No	Yes	Yes	No	Neutral	Family and friends	Not collected in this dataset	No	No	No	0			FALSE	FALSE	FALSE	5
U-184	Urban	Under 25	Female	Undergraduate Degree	2	Yes	Very comfortable	Very willing	No	Yes	Yes	Yes	Somewhat influential	Internet	Not collected in this dataset	No	No	No	1	No	None	FALSE	FALSE	TRUE	5
U-185	Urban	Under 25	Female	Undergraduate Degree	0	No	Neutral	Very willing	Yes	Yes	Yes	Yes	Very influential	Paediatric dentist	Not collected in this dataset	No	No	No	0			TRUE	FALSE	FALSE	3
U-186	Urban	35-44	Female	Undergraduate Degree	0	Yes	Very comfortable	Very willing	Yes	Yes	Yes	No	Somewhat influential	Paediatric dentist, Internet, Books or educational materials	Not collected in this dataset	No	No	No	1	No	None	TRUE	FALSE	TRUE	5
U-187	Urban	25-34	Female	Undergraduate Degree	2	No	Very comfortable	Very willing	No	Yes	No	No	Somewhat influential	Paediatric dentist, General dentist	Not collected in this dataset	No	No	No	0			TRUE	FALSE	FALSE	5
U-188	Urban	25-34	Male	Postgraduate Degree	1	No	Neutral	Very willing	Yes	Yes	No	No	Somewhat influential	Paediatric dentist, General dentist	Not collected in this dataset	No	No	No	0			TRUE	FALSE	FALSE	3
U-189	Urban	25-34	Female	Undergraduate Degree	0	No	Neutral	Not willing at all	No	Yes	Yes	No	Neutral	Paediatric dentist, General dentist	Not collected in this dataset	No	No	No	0			TRUE	FALSE	FALSE	3
U-190	Urban	Under 25	Female	Undergraduate Degree	1	No	Somewhat comfortable	Neutral	Unsure	Yes	Yes	No	Somewhat influential	Paediatric dentist	Not collected in this dataset	No	No	No	0			TRUE	FALSE	FALSE	4
U-191	Urban	Under 25	Female	Professional Degree	0	No	Very comfortable	Neutral	Yes	Yes	Yes	Yes	Neutral	General dentist	Not collected in this dataset	No	No	No	0			TRUE	FALSE	FALSE	5
U-192	Urban	25-34	Male	Postgraduate Degree	3 and more	Yes	Very comfortable	Neutral	Yes	Yes	Yes	Yes	Neutral	Books or educational materials	Not collected in this dataset	No	No	No	1	No	None	FALSE	FALSE	FALSE	5
U-193	Urban	25-34	Female	Undergraduate Degree	2	No	Very comfortable	Very willing	Yes	Yes	No	No	Neutral	General dentist, Internet	Not collected in this dataset	No	No	No	0			TRUE	FALSE	TRUE	5
U-194	Urban	25-34	Female	Undergraduate Degree	1	No	Very comfortable	Not very willing	Yes	Yes	Yes	No	Neutral	General dentist	Not collected in this dataset	No	No	No	0			TRUE	FALSE	FALSE	5
U-195	Urban	25-34	Non-binary	Undergraduate Degree	2	No	Somewhat comfortable	Very willing	Yes	Yes	Yes	No	Very influential	Internet	Not collected in this dataset	No	No	No	0			FALSE	FALSE	TRUE	4
U-196	Urban	Under 25	Female	Postgraduate Degree	0	No	Very comfortable	Very willing	Yes	Yes	Yes	Yes	Somewhat influential	Family and friends, Paediatric dentist, General dentist	Not collected in this dataset	No	No	No	0			TRUE	FALSE	FALSE	5
U-197	Urban	25-34	Male	Undergraduate Degree	1	No	Very comfortable	Very willing	Yes	Yes	Yes	Yes	Very influential	Family and friends	Not collected in this dataset	No	No	No	0			FALSE	FALSE	FALSE	5
U-198	Urban	Under 25	Male	Professional Degree	1	Yes	Very comfortable	Very willing	Yes	Yes	Yes	Yes	Not very influential	General dentist, Internet	Not collected in this dataset	No	No	No	1	No	None	TRUE	FALSE	TRUE	5
U-199	Urban	25-34	Male	Undergraduate Degree	2	No	Very comfortable	Very willing	Yes	Yes	No	No	Somewhat influential	General dentist	Not collected in this dataset	No	No	No	0			TRUE	FALSE	FALSE	5
U-200	Urban	45-54	Male	Professional Degree	3 and more	No	Very comfortable	Not very willing	Unsure	Yes	Yes	Yes	Somewhat influential	Internet	Not collected in this dataset	No	No	No	0			FALSE	FALSE	TRUE	5
U-201	Urban	35-44	Female	Undergraduate Degree	2	Yes	Very comfortable	Very willing	Unsure	Yes	Yes	No	Somewhat influential	Internet	Not collected in this dataset	No	No	No	1	No	None	FALSE	FALSE	TRUE	5
U-202	Urban	Under 25	Female	Undergraduate Degree	2	No	Very comfortable	Somewhat willing	Unsure	Yes	Yes	No	Neutral	Paediatric dentist	Not collected in this dataset	No	No	No	0			TRUE	FALSE	FALSE	5
U-203	Urban	Under 25	Female	Undergraduate Degree	0	Yes	Very comfortable	Very willing	Unsure	Yes	Yes	Yes	Neutral	General dentist	Not collected in this dataset	No	No	No	1	No	None	TRUE	FALSE	FALSE	5
U-204	Urban	35-44	Female	Undergraduate Degree	2	No	Very comfortable	Very willing	Yes	Yes	Yes	Yes	Not influential at all	Paediatric dentist, General dentist	Not collected in this dataset	No	No	No	0			TRUE	FALSE	FALSE	5
U-205	Urban	45-54	Female	Undergraduate Degree	2	No	Very comfortable	Not very willing	No	Yes	Yes	No	Neutral	Internet	Not collected in this dataset	No	No	No	0			FALSE	FALSE	TRUE	5
U-206	Urban	45-54	Female	Undergraduate Degree	1	Yes	Very comfortable	Very willing	Yes	Yes	Yes	Yes	Not influential at all	Family and friends	Not collected in this dataset	No	No	No	1	No	None	FALSE	FALSE	FALSE	5
U-207	Urban	Under 25	Female	Undergraduate Degree	1	No	Very comfortable	Somewhat willing	Unsure	Yes	Yes	No	Somewhat influential	Family and friends, Internet	Not collected in this dataset	No	No	No	0			FALSE	FALSE	TRUE	5
U-208	Urban	25-34	Female	Postgraduate Degree	1	No	Very comfortable	Very willing	Unsure	Yes	Yes	No	Somewhat influential	General dentist	Not collected in this dataset	No	No	No	0			TRUE	FALSE	FALSE	5
U-209	Urban	25-34	Female	Undergraduate Degree	1	No	Very comfortable	Somewhat willing	Yes	Yes	No	Yes	Very influential	Paediatric dentist	Not collected in this dataset	No	No	No	0			TRUE	FALSE	FALSE	5
U-210	Urban	25-34	Female	Undergraduate Degree	2	No	Somewhat comfortable	Not very willing	No	Yes	Yes	No	Very influential	Family and friends, General dentist	Not collected in this dataset	No	No	Yes	0			TRUE	FALSE	FALSE	4
U-211	Urban	Under 25	Male	Postgraduate Degree	2	No	Somewhat comfortable	Not very willing	Yes	Yes	Yes	No	Somewhat influential	Internet	Not collected in this dataset	No	No	Yes	0			FALSE	FALSE	TRUE	4
U-212	Urban	25-34	Female	Undergraduate Degree	1	Yes	Very comfortable	Very willing	Yes	Yes	Yes	No	Somewhat influential	General dentist	Not collected in this dataset	No	No	Yes	1	No	None	TRUE	FALSE	FALSE	5
U-213	Urban	Under 25	Female	Postgraduate Degree	1	No	Very comfortable	Very willing	Yes	Yes	No	No	Neutral	Paediatric dentist	Not collected in this dataset	No	No	Yes	0			TRUE	FALSE	FALSE	5
U-214	Urban	45-54	Female	Undergraduate Degree	3 and more	No	Very comfortable	Very willing	Yes	Yes	Yes	No	Somewhat influential	Family and friends	Not collected in this dataset	No	No	Yes	0			FALSE	FALSE	FALSE	5
U-215	Urban	35-44	Female	Professional Degree	2	Yes	Very comfortable	Neutral	No	Yes	Yes	Yes	Very influential	General dentist	Not collected in this dataset	No	No	Yes	1	No	None	TRUE	FALSE	FALSE	5
U-216	Urban	45-54	Female	PhD	2	No	Very comfortable	Not very willing	Yes	Yes	Yes	No	Somewhat influential	General dentist	Not collected in this dataset	No	No	Yes	0			TRUE	FALSE	FALSE	5
U-217	Urban	25-34	Female	Undergraduate Degree	0	Yes	Somewhat comfortable	Very willing	No	Yes	No	No	Not very influential	General dentist	Not collected in this dataset	No	No	Yes	1	No	None	TRUE	FALSE	FALSE	4
U-218	Urban	Under 25	Female	Undergraduate Degree	2	Yes	Very comfortable	Somewhat willing	Yes	Yes	Yes	Yes	Very influential	General dentist	Not collected in this dataset	No	No	Yes	1	No	None	TRUE	FALSE	FALSE	5
U-219	Urban	45-54	Male	Undergraduate Degree	1	No	Somewhat comfortable	Neutral	Yes	Yes	Yes	Yes	Neutral	General dentist, Internet	Not collected in this dataset	No	No	Yes	0			TRUE	FALSE	TRUE	4
U-220	Urban	Under 25	Female	Postgraduate Degree	0	No	Neutral	Neutral	No	Yes	Yes	No	Neutral	Paediatric dentist	Not collected in this dataset	No	No	Yes	0			TRUE	FALSE	FALSE	3
U-221	Urban	45-54	Male	Undergraduate Degree	1	Yes	Very comfortable	Neutral	Yes	Yes	Yes	Yes	Somewhat influential	Books or educational materials	Not collected in this dataset	No	No	Yes	1	No	None	FALSE	FALSE	FALSE	5
U-222	Urban	25-34	Female	PhD	1	No	Very comfortable	Very willing	Yes	Yes	Yes	No	Not influential at all	Paediatric dentist	Not collected in this dataset	No	No	Yes	0			TRUE	FALSE	FALSE	5
U-223	Urban	25-34	Female	Postgraduate Degree	2	No	Neutral	Neutral	Yes	Yes	Yes	Yes	Somewhat influential	Family and friends, General dentist	Not collected in this dataset	No	No	Yes	0			TRUE	FALSE	FALSE	3
U-224	Urban	Under 25	Non-binary	Undergraduate Degree	3 and more	Yes	Neutral	Very willing	Yes	Yes	Yes	Yes	Very influential	Paediatric dentist, General dentist	Not collected in this dataset	No	No	Yes	1	No	None	TRUE	FALSE	FALSE	3
U-225	Urban	25-34	Female	Postgraduate Degree	0	Yes	Somewhat comfortable	Very willing	No	Yes	Yes	No	Not very influential	Family and friends, Paediatric dentist	Not collected in this dataset	No	No	Yes	1	No	None	TRUE	FALSE	FALSE	4
U-226	Urban	45-54	Male	Undergraduate Degree	2	No	Very comfortable	Not willing at all	Unsure	Yes	Yes	No	Not very influential	General dentist, Internet	Not collected in this dataset	No	No	Yes	0			TRUE	FALSE	TRUE	5
U-227	Urban	45-54	Male	Professional Degree	0	No	Very comfortable	Very willing	No	Yes	Yes	No	Very influential	General dentist	Not collected in this dataset	No	No	Yes	0			TRUE	FALSE	FALSE	5
U-228	Urban	25-34	Female	Undergraduate Degree	0	No	Very comfortable	Not very willing	Yes	Yes	Yes	No	Neutral	Paediatric dentist	Not collected in this dataset	No	No	Yes	0			TRUE	FALSE	FALSE	5
U-229	Urban	35-44	Female	Undergraduate Degree	0	Yes	Very comfortable	Very willing	Yes	Yes	No	No	Somewhat influential	Family and friends, Paediatric dentist, General dentist, Internet, Books or educational materials	Not collected in this dataset	No	No	Yes	1	No	None	TRUE	FALSE	TRUE	5
U-230	Urban	35-44	Female	Undergraduate Degree	2	No	Very comfortable	Very willing	Unsure	Yes	Yes	Yes	Very influential	Paediatric dentist	Not collected in this dataset	No	No	Yes	0			TRUE	FALSE	FALSE	5
U-231	Urban	35-44	Male	Undergraduate Degree	2	Yes	Somewhat comfortable	Not very willing	Yes	Yes	Yes	No	Not very influential	Paediatric dentist	Not collected in this dataset	No	No	Yes	1	No	None	TRUE	FALSE	FALSE	4
U-232	Urban	35-44	Female	Postgraduate Degree	0	No	Very comfortable	Not very willing	No	Yes	No	No	Very influential	Family and friends, General dentist	Not collected in this dataset	No	No	Yes	0			TRUE	FALSE	FALSE	5
U-233	Urban	35-44	Female	Undergraduate Degree	1	No	Very comfortable	Very willing	Yes	Yes	Yes	No	Not very influential	General dentist	Not collected in this dataset	No	No	Yes	0			TRUE	FALSE	FALSE	5
U-234	Urban	25-34	Female	Undergraduate Degree	0	Yes	Somewhat comfortable	Very willing	Unsure	Yes	No	No	Not very influential	Books or educational materials	Not collected in this dataset	No	No	Yes	1	No	None	FALSE	FALSE	FALSE	4
U-235	Urban	Under 25	Female	Undergraduate Degree	0	No	Very comfortable	Very willing	Yes	Unsure	Yes	No	Not very influential	Family and friends, General dentist, Internet, Books or educational materials	Not collected in this dataset	No	No	Yes	0			TRUE	FALSE	TRUE	5
U-236	Urban	45-54	Female	Undergraduate Degree	1	No	Somewhat comfortable	Very willing	Yes	Yes	Yes	Yes	Very influential	General dentist, Internet	Not collected in this dataset	No	No	Yes	0			TRUE	FALSE	TRUE	4
U-237	Urban	Under 25	Female	Undergraduate Degree	0	No	Very comfortable	Very willing	Yes	Yes	Yes	No	Somewhat influential	Paediatric dentist	Not collected in this dataset	No	No	Yes	0			TRUE	FALSE	FALSE	5
U-238	Urban	25-34	Female	Professional Degree	2	No	Somewhat comfortable	Somewhat willing	Yes	Yes	No	Yes	Neutral	Paediatric dentist, General dentist	Not collected in this dataset	No	No	Yes	0			TRUE	FALSE	FALSE	4
U-239	Urban	45-54	Male	Postgraduate Degree	1	No	Very comfortable	Very willing	Yes	Yes	Yes	No	Very influential	General dentist, Internet	Not collected in this dataset	No	No	Yes	0			TRUE	FALSE	TRUE	5
U-240	Urban	Under 25	Female	Undergraduate Degree	0	Yes	Somewhat comfortable	Very willing	Yes	Yes	Yes	No	Very influential	Internet	Not collected in this dataset	No	No	Yes	1	No	None	FALSE	FALSE	TRUE	4
R-1	Rural	Under 25	Female	Professional Degree	2	No	Very comfortable	Very willing	No	Yes	Yes	Yes	Neutral	Internet	Not collected in this dataset	Yes	No	No	0			FALSE	FALSE	TRUE	5
R-2	Rural	Under 25	Female	Professional Degree	2	No	Neutral	Neutral	No	Yes	No	No	Not very influential	Paediatric dentist	Not collected in this dataset	Yes	No	No	0			TRUE	FALSE	FALSE	3
R-3	Rural	45-54	Male	Undergraduate Degree	2	No	Very comfortable	Not willing at all	Yes	Yes	No	No	Somewhat influential	General dentist, Internet, community members	Not collected in this dataset	Yes	No	No	0			TRUE	TRUE	TRUE	5
R-4	Rural	Under 25	Female	Undergraduate Degree	0	No	Neutral	Very willing	Yes	Yes	Yes	No	Neutral	Books or educational materials	Not collected in this dataset	Yes	No	No	0			FALSE	FALSE	FALSE	3
R-5	Rural	25-34	Female	Professional Degree	0	No	Somewhat uncomfortable	Neutral	Unsure	Yes	No	No	Somewhat influential	Internet	Not collected in this dataset	No	Yes	No	0			FALSE	FALSE	TRUE	2
R-6	Rural	Under 25	Male	Professional Degree	2	No	Very comfortable	Very willing	Yes	Yes	Yes	No	Not very influential	General dentist	Not collected in this dataset	No	Yes	No	0			TRUE	FALSE	FALSE	5
R-7	Rural	35-44	Female	Professional Degree	1	No	Somewhat comfortable	Somewhat willing	Unsure	Yes	Yes	No	Somewhat influential	Internet	Not collected in this dataset	No	Yes	No	0			FALSE	FALSE	TRUE	4
R-8	Rural	45-54	Male	Undergraduate Degree	2	No	Neutral	Very willing	Yes	Yes	No	No	Somewhat influential	Internet	Not collected in this dataset	No	Yes	No	0			FALSE	FALSE	TRUE	3
R-9	Rural	35-44	Male	Professional Degree	0	No	Neutral	Neutral	No	Yes	Yes	No	Somewhat influential	Family and friends	Not collected in this dataset	No	Yes	No	0			FALSE	FALSE	FALSE	3
R-10	Rural	45-54	Male	Professional Degree	0	No	Very comfortable	Neutral	No	Yes	Yes	No	Neutral	General dentist, community members	Not collected in this dataset	No	Yes	No	0			TRUE	TRUE	FALSE	5
R-11	Rural	25-34	Female	Undergraduate Degree	1	No	Somewhat comfortable	Very willing	No	Yes	Yes	No	Neutral	Books or educational materials	Not collected in this dataset	No	Yes	No	0			FALSE	FALSE	FALSE	4
R-12	Rural	25-34	Female	Professional Degree	1	No	Very comfortable	Neutral	No	Unsure	No	No	Not very influential	General dentist	Not collected in this dataset	No	Yes	No	0			TRUE	FALSE	FALSE	5
R-13	Rural	25-34	Female	Undergraduate Degree	1	No	Very comfortable	Very willing	Unsure	Yes	Yes	Yes	Neutral	General dentist, community members	Not collected in this dataset	No	Yes	No	0			TRUE	TRUE	FALSE	5
R-14	Rural	25-34	Female	Undergraduate Degree	0	No	Neutral	Not very willing	No	Yes	No	Yes	Somewhat influential	Books or educational materials	Not collected in this dataset	No	Yes	No	0			FALSE	FALSE	FALSE	3
R-15	Rural	Under 25	Female	Professional Degree	2	No	Neutral	Very willing	Unsure	Yes	Yes	Yes	Somewhat influential	Family and friends	Not collected in this dataset	No	Yes	No	0			FALSE	FALSE	FALSE	3
R-16	Rural	35-44	Male	PhD	2	No	Neutral	Somewhat willing	Yes	Yes	Yes	No	Somewhat influential	Books or educational materials, community members	Not collected in this dataset	No	Yes	No	0			FALSE	TRUE	FALSE	3
R-17	Rural	45-54	Female	Undergraduate Degree	2	No	Neutral	Neutral	Yes	No	Yes	No	Neutral	General dentist, community members	Not collected in this dataset	No	Yes	No	0			TRUE	TRUE	FALSE	3
R-18	Rural	45-54	Female	Professional Degree	2	No	Neutral	Very willing	Unsure	Yes	Yes	Yes	Neutral	Internet	Not collected in this dataset	No	Yes	No	0			FALSE	FALSE	TRUE	3
R-19	Rural	35-44	Female	Professional Degree	1	No	Somewhat comfortable	Neutral	Yes	Yes	No	No	Neutral	Family and friends, community members	Not collected in this dataset	No	Yes	No	0			FALSE	TRUE	FALSE	4
R-20	Rural	25-34	Female	Undergraduate Degree	2	No	Very comfortable	Not willing at all	No	Yes	No	No	Somewhat influential	General dentist, community members	Not collected in this dataset	No	Yes	No	0			TRUE	TRUE	FALSE	5
R-21	Rural	35-44	Female	Undergraduate Degree	1	No	Very comfortable	Very willing	Yes	Yes	No	No	Somewhat influential	Internet	Not collected in this dataset	No	Yes	No	0			FALSE	FALSE	TRUE	5
R-22	Rural	45-54	Female	Professional Degree	1	No	Neutral	Very willing	Unsure	Yes	Yes	Yes	Somewhat influential	Paediatric dentist	Not collected in this dataset	No	Yes	No	0			TRUE	FALSE	FALSE	3
R-23	Rural	45-54	Male	Professional Degree	1	No	Neutral	Very willing	No	Yes	Yes	No	Somewhat influential	Family and friends	Not collected in this dataset	No	Yes	No	0			FALSE	FALSE	FALSE	3
R-24	Rural	25-34	Male	Undergraduate Degree	0	No	Neutral	Neutral	Yes	Yes	Yes	No	Somewhat influential	Internet	Not collected in this dataset	No	Yes	No	0			FALSE	FALSE	TRUE	3
R-25	Rural	35-44	Female	Undergraduate Degree	0	No	Neutral	Not very willing	Yes	Yes	Yes	Yes	Neutral	Family and friends, community members	Not collected in this dataset	No	Yes	No	0			FALSE	TRUE	FALSE	3
R-26	Rural	25-34	Female	Undergraduate Degree	1	No	Somewhat comfortable	Very willing	Unsure	Yes	Yes	No	Somewhat influential	General dentist	Not collected in this dataset	No	Yes	No	0			TRUE	FALSE	FALSE	4
R-27	Rural	35-44	Female	Undergraduate Degree	0	No	Very comfortable	Neutral	Yes	Yes	No	No	Neutral	Paediatric dentist	Not collected in this dataset	No	Yes	No	0			TRUE	FALSE	FALSE	5
R-28	Rural	35-44	Female	Undergraduate Degree	1	No	Very comfortable	Neutral	Yes	Yes	No	No	Very influential	Family and friends	Not collected in this dataset	No	Yes	No	0			FALSE	FALSE	FALSE	5
R-29	Rural	35-44	Male	Professional Degree	0	No	Somewhat comfortable	Neutral	No	Yes	No	No	Somewhat influential	General dentist, Internet	Not collected in this dataset	No	Yes	No	0			TRUE	FALSE	TRUE	4
R-30	Rural	Under 25	Male	Undergraduate Degree	0	No	Neutral	Neutral	No	Yes	Yes	No	Not influential at all	Books or educational materials, community members	Not collected in this dataset	No	Yes	No	0			FALSE	TRUE	FALSE	3
R-31	Rural	45-54	Female	Professional Degree	0	No	Very comfortable	Neutral	Yes	Yes	Yes	No	Neutral	Books or educational materials, community members	Not collected in this dataset	No	Yes	No	0			FALSE	TRUE	FALSE	5
R-32	Rural	25-34	Female	Professional Degree	0	No	Neutral	Neutral	Yes	Yes	Yes	Yes	Very influential	Books or educational materials, community members	Not collected in this dataset	No	Yes	No	0			FALSE	TRUE	FALSE	3
R-33	Rural	25-34	Female	Undergraduate Degree	1	No	Very comfortable	Not very willing	No	No	Yes	No	Neutral	Paediatric dentist	Not collected in this dataset	No	Yes	No	0			TRUE	FALSE	FALSE	5
R-34	Rural	25-34	Male	Professional Degree	1	No	Neutral	Neutral	No	Yes	Yes	Yes	Somewhat influential	Paediatric dentist	Not collected in this dataset	No	Yes	No	0			TRUE	FALSE	FALSE	3
R-35	Rural	25-34	Female	Professional Degree	0	No	Neutral	Very willing	Yes	Yes	No	No	Neutral	Paediatric dentist	Not collected in this dataset	No	Yes	No	0			TRUE	FALSE	FALSE	3
R-36	Rural	25-34	Female	Professional Degree	1	No	Neutral	Very willing	Yes	Yes	Yes	Yes	Neutral	General dentist	Not collected in this dataset	No	Yes	No	0			TRUE	FALSE	FALSE	3
R-37	Rural	45-54	Female	Undergraduate Degree	2	No	Somewhat comfortable	Very willing	No	Yes	Yes	Yes	Somewhat influential	General dentist	Not collected in this dataset	No	Yes	No	0			TRUE	FALSE	FALSE	4
R-38	Rural	Under 25	Male	Postgraduate Degree	0	No	Very comfortable	Somewhat willing	Yes	Yes	No	No	Very influential	Family and friends	Not collected in this dataset	No	Yes	No	0			FALSE	FALSE	FALSE	5
R-39	Rural	Under 25	Female	Postgraduate Degree	0	No	Somewhat comfortable	Not very willing	Yes	Unsure	Yes	Yes	Neutral	Internet	Not collected in this dataset	No	Yes	No	0			FALSE	FALSE	TRUE	4
R-40	Rural	45-54	Female	Undergraduate Degree	0	No	Very comfortable	Neutral	Yes	Yes	Yes	Yes	Somewhat influential	General dentist	Not collected in this dataset	No	Yes	No	0			TRUE	FALSE	FALSE	5
R-41	Rural	Under 25	Female	Undergraduate Degree	1	No	Neutral	Very willing	Unsure	Unsure	Yes	No	Somewhat influential	Paediatric dentist	Not collected in this dataset	No	Yes	No	0			TRUE	FALSE	FALSE	3
R-42	Rural	25-34	Male	Undergraduate Degree	1	No	Neutral	Not very willing	Yes	Yes	Yes	Yes	Neutral	Internet	Not collected in this dataset	No	Yes	No	0			FALSE	FALSE	TRUE	3
R-43	Rural	25-34	Female	Professional Degree	1	No	Very comfortable	Not very willing	No	Yes	Yes	No	Somewhat influential	Books or educational materials, community members	Not collected in this dataset	No	Yes	No	0			FALSE	TRUE	FALSE	5
R-44	Rural	35-44	Female	Professional Degree	1	Yes	Very comfortable	Very willing	No	Yes	Yes	No	Neutral	Family and friends, Paediatric dentist	Not collected in this dataset	No	Yes	No	1	No	Named	TRUE	FALSE	FALSE	5
R-45	Rural	45-54	Female	Undergraduate Degree	0	No	Very comfortable	Not very willing	Yes	Yes	Yes	No	Somewhat influential	General dentist, Books or educational materials	Not collected in this dataset	No	Yes	No	0			TRUE	FALSE	FALSE	5
R-46	Rural	Under 25	Female	Postgraduate Degree	2	No	Very comfortable	Very willing	No	Yes	Yes	No	Neutral	Books or educational materials, community members	Not collected in this dataset	No	Yes	No	0			FALSE	TRUE	FALSE	5
R-47	Rural	35-44	Female	Undergraduate Degree	1	Yes	Neutral	Neutral	No	Yes	Yes	No	Neutral	Family and friends, Books or educational materials	Not collected in this dataset	No	Yes	No	1	No	Named	FALSE	FALSE	FALSE	3
R-48	Rural	35-44	Female	Postgraduate Degree	0	No	Somewhat comfortable	Very willing	Yes	Yes	No	Yes	Somewhat influential	Internet	Not collected in this dataset	No	Yes	No	0			FALSE	FALSE	TRUE	4
R-49	Rural	45-54	Female	Undergraduate Degree	0	No	Very comfortable	Very willing	No	Yes	Yes	Yes	Very influential	Family and friends	Not collected in this dataset	No	Yes	No	0			FALSE	FALSE	FALSE	5
R-50	Rural	Under 25	Female	Professional Degree	2	No	Neutral	Neutral	Yes	Unsure	No	No	Neutral	Family and friends, Internet	Not collected in this dataset	No	Yes	No	0			FALSE	FALSE	TRUE	3
R-51	Rural	Under 25	Female	Professional Degree	0	No	Neutral	Very willing	No	Yes	No	Yes	Somewhat influential	General dentist	Not collected in this dataset	No	Yes	No	0			TRUE	FALSE	FALSE	3
R-52	Rural	45-54	Female	Undergraduate Degree	2	No	Somewhat comfortable	Not very willing	Yes	Yes	Yes	Yes	Neutral	Paediatric dentist, community members	Not collected in this dataset	No	Yes	No	0			TRUE	TRUE	FALSE	4
R-53	Rural	45-54	Female	Undergraduate Degree	0	No	Somewhat comfortable	Neutral	No	Yes	No	No	Neutral	Internet, Books or educational materials	Not collected in this dataset	No	Yes	No	0			FALSE	FALSE	TRUE	4
R-54	Rural	Under 25	Male	Undergraduate Degree	1	No	Very comfortable	Neutral	Yes	Yes	No	Yes	Somewhat influential	Family and friends	Not collected in this dataset	No	Yes	No	0			FALSE	FALSE	FALSE	5
R-55	Rural	45-54	Female	Professional Degree	0	No	Very comfortable	Neutral	Unsure	Yes	No	Yes	Somewhat influential	Family and friends	Not collected in this dataset	No	Yes	No	0			FALSE	FALSE	FALSE	5
R-56	Rural	25-34	Female	Professional Degree	1	No	Neutral	Not very willing	Unsure	Yes	Yes	No	Neutral	General dentist, community members	Not collected in this dataset	No	Yes	No	0			TRUE	TRUE	FALSE	3
R-57	Rural	Under 25	Female	Postgraduate Degree	1	Yes	Neutral	Somewhat willing	No	Yes	No	Yes	Somewhat influential	Paediatric dentist, community members	Not collected in this dataset	No	Yes	No	1	No	Named	TRUE	TRUE	FALSE	3
R-58	Rural	25-34	Male	Undergraduate Degree	1	No	Somewhat comfortable	Not very willing	Yes	Yes	No	No	Neutral	Paediatric dentist, General dentist	Not collected in this dataset	No	Yes	No	0			TRUE	FALSE	FALSE	4
R-59	Rural	35-44	Female	Professional Degree	0	No	Neutral	Very willing	No	Unsure	Yes	No	Somewhat influential	Family and friends	Not collected in this dataset	No	Yes	No	0			FALSE	FALSE	FALSE	3
R-60	Rural	25-34	Male	Undergraduate Degree	0	No	Very comfortable	Very willing	Unsure	Unsure	No	No	Neutral	Family and friends	Not collected in this dataset	No	Yes	No	0			FALSE	FALSE	FALSE	5
R-61	Rural	35-44	Female	Undergraduate Degree	1	No	Neutral	Neutral	Unsure	Yes	No	Yes	Very influential	Family and friends, community members	Not collected in this dataset	No	Yes	No	0			FALSE	TRUE	FALSE	3
R-62	Rural	Under 25	Female	Professional Degree	2	No	Neutral	Very willing	Yes	Yes	No	No	Neutral	Paediatric dentist	Not collected in this dataset	No	Yes	No	0			TRUE	FALSE	FALSE	3
R-63	Rural	35-44	Female	Postgraduate Degree	2	No	Neutral	Very willing	No	Yes	No	Yes	Somewhat influential	Books or educational materials	Not collected in this dataset	No	Yes	No	0			FALSE	FALSE	FALSE	3
R-64	Rural	25-34	Female	Professional Degree	0	No	Very comfortable	Not very willing	Yes	Yes	Yes	No	Very influential	General dentist	Not collected in this dataset	No	Yes	No	0			TRUE	FALSE	FALSE	5
R-65	Rural	45-54	Male	Professional Degree	0	No	Very comfortable	Very willing	Yes	Yes	No	No	Somewhat influential	Family and friends	Not collected in this dataset	No	Yes	No	0			FALSE	FALSE	FALSE	5
R-66	Rural	35-44	Male	Postgraduate Degree	2	No	Very comfortable	Neutral	Unsure	Yes	No	No	Somewhat influential	Paediatric dentist	Not collected in this dataset	No	Yes	No	0			TRUE	FALSE	FALSE	5
R-67	Rural	35-44	Female	Professional Degree	0	No	Neutral	Neutral	No	Yes	Yes	No	Neutral	General dentist, Internet, community members	Not collected in this dataset	No	Yes	No	0			TRUE	TRUE	TRUE	3
R-68	Rural	Under 25	Female	Undergraduate Degree	0	No	Neutral	Not very willing	Unsure	Yes	No	Yes	Very influential	Books or educational materials	Not collected in this dataset	No	Yes	No	0			FALSE	FALSE	FALSE	3
R-69	Rural	25-34	Female	Undergraduate Degree	1	No	Very comfortable	Neutral	No	Yes	No	No	Somewhat influential	Paediatric dentist	Not collected in this dataset	No	Yes	No	0			TRUE	FALSE	FALSE	5
R-70	Rural	45-54	Female	PhD	0	No	Somewhat uncomfortable	Not willing at all	Unsure	Yes	Yes	No	Neutral	Paediatric dentist, Books or educational materials, community members	Not collected in this dataset	No	Yes	No	0			TRUE	TRUE	FALSE	2
R-71	Rural	Under 25	Female	Postgraduate Degree	0	No	Very comfortable	Not very willing	Unsure	Yes	Yes	Yes	Neutral	Books or educational materials	Not collected in this dataset	No	Yes	No	0			FALSE	FALSE	FALSE	5
R-72	Rural	25-34	Female	Undergraduate Degree	0	Yes	Very comfortable	Not willing at all	Yes	Yes	No	No	Neutral	Internet	Not collected in this dataset	No	Yes	No	1	No	Named	FALSE	FALSE	TRUE	5
R-73	Rural	25-34	Female	PhD	2	No	Neutral	Very willing	No	Yes	Yes	No	Neutral	Family and friends	Not collected in this dataset	No	Yes	No	0			FALSE	FALSE	FALSE	3
R-74	Rural	25-34	Female	Undergraduate Degree	0	No	Neutral	Very willing	No	Yes	Yes	No	Very influential	General dentist	Not collected in this dataset	No	Yes	No	0			TRUE	FALSE	FALSE	3
R-75	Rural	Under 25	Female	Professional Degree	0	No	Somewhat uncomfortable	Neutral	Yes	Yes	No	No	Somewhat influential	General dentist, Internet, Books or educational materials	Not collected in this dataset	No	Yes	No	0			TRUE	FALSE	TRUE	2
R-76	Rural	25-34	Female	Undergraduate Degree	1	No	Neutral	Neutral	No	Yes	No	No	Neutral	Internet, community members	Not collected in this dataset	No	Yes	No	0			FALSE	TRUE	TRUE	3
R-77	Rural	45-54	Female	Undergraduate Degree	0	No	Neutral	Not very willing	Yes	Yes	Yes	No	Very influential	Internet	Not collected in this dataset	No	Yes	No	0			FALSE	FALSE	TRUE	3
R-78	Rural	35-44	Female	Professional Degree	2	No	Very comfortable	Neutral	Unsure	Yes	No	No	Neutral	General dentist	Not collected in this dataset	No	Yes	No	0			TRUE	FALSE	FALSE	5
R-79	Rural	25-34	Female	Professional Degree	1	No	Very comfortable	Very willing	Yes	Yes	Yes	Yes	Somewhat influential	Paediatric dentist, community members	Not collected in this dataset	No	Yes	No	0			TRUE	TRUE	FALSE	5
R-80	Rural	45-54	Male	Undergraduate Degree	2	No	Somewhat comfortable	Very willing	No	Yes	Yes	Yes	Somewhat influential	Paediatric dentist, Internet	Not collected in this dataset	No	Yes	No	0			TRUE	FALSE	TRUE	4
R-81	Rural	45-54	Female	Undergraduate Degree	0	No	Very comfortable	Very willing	Unsure	Yes	Yes	No	Very influential	Books or educational materials	Not collected in this dataset	No	Yes	No	0			FALSE	FALSE	FALSE	5
R-82	Rural	Under 25	Female	Undergraduate Degree	0	No	Neutral	Very willing	Unsure	Yes	Yes	No	Neutral	Internet	Not collected in this dataset	No	Yes	No	0			FALSE	FALSE	TRUE	3
R-83	Rural	25-34	Female	Professional Degree	2	No	Neutral	Very willing	Unsure	Yes	No	Yes	Not influential at all	Family and friends	Not collected in this dataset	No	Yes	No	0			FALSE	FALSE	FALSE	3
R-84	Rural	45-54	Female	Postgraduate Degree	0	No	Very comfortable	Not very willing	No	Yes	Yes	Yes	Very influential	Family and friends	Not collected in this dataset	No	Yes	No	0			FALSE	FALSE	FALSE	5
R-85	Rural	45-54	Female	Postgraduate Degree	0	No	Neutral	Somewhat willing	Yes	Unsure	No	Yes	Somewhat influential	Paediatric dentist, community members	Not collected in this dataset	No	Yes	No	0			TRUE	TRUE	FALSE	3
R-86	Rural	Under 25	Female	Undergraduate Degree	2	No	Very comfortable	Not willing at all	Yes	Yes	Yes	Yes	Somewhat influential	Internet	Not collected in this dataset	No	Yes	No	0			FALSE	FALSE	TRUE	5
R-87	Rural	45-54	Female	Professional Degree	1	Yes	Neutral	Not willing at all	Unsure	Yes	No	No	Neutral	Internet	Not collected in this dataset	No	Yes	No	1	No	Named	FALSE	FALSE	TRUE	3
R-88	Rural	Under 25	Male	Undergraduate Degree	2	No	Neutral	Neutral	Unsure	Yes	Yes	No	Not influential at all	Family and friends, General dentist	Not collected in this dataset	No	Yes	No	0			TRUE	FALSE	FALSE	3
R-89	Rural	Under 25	Male	Professional Degree	0	No	Very comfortable	Neutral	Yes	Yes	Yes	Yes	Not very influential	Internet	Not collected in this dataset	No	No	No	0			FALSE	FALSE	TRUE	5
R-90	Rural	25-34	Female	Postgraduate Degree	2	No	Very comfortable	Not willing at all	Unsure	Yes	Yes	No	Somewhat influential	Internet	Not collected in this dataset	No	No	No	0			FALSE	FALSE	TRUE	5
R-91	Rural	45-54	Female	Undergraduate Degree	0	No	Somewhat comfortable	Neutral	Yes	Yes	Yes	No	Somewhat influential	General dentist, community members	Not collected in this dataset	No	No	No	0			TRUE	TRUE	FALSE	4
R-92	Rural	25-34	Male	Professional Degree	0	No	Neutral	Neutral	Unsure	Yes	Yes	Yes	Neutral	General dentist	Not collected in this dataset	No	No	No	0			TRUE	FALSE	FALSE	3
R-93	Rural	Under 25	Male	Postgraduate Degree	1	No	Somewhat comfortable	Neutral	Unsure	Yes	Yes	Yes	Neutral	General dentist	Not collected in this dataset	No	No	No	0			TRUE	FALSE	FALSE	4
R-94	Rural	25-34	Female	Undergraduate Degree	0	No	Somewhat comfortable	Very willing	No	Yes	Yes	No	Somewhat influential	General dentist	Not collected in this dataset	No	No	No	0			TRUE	FALSE	FALSE	4
R-95	Rural	25-34	Female	PhD	0	No	Very comfortable	Neutral	No	Yes	Yes	Yes	Not influential at all	Family and friends, community members	Not collected in this dataset	No	No	No	0			FALSE	TRUE	FALSE	5
R-96	Rural	Under 25	Female	Professional Degree	0	No	Very comfortable	Somewhat willing	Yes	Yes	No	Yes	Somewhat influential	Internet	Not collected in this dataset	No	No	No	0			FALSE	FALSE	TRUE	5
R-97	Rural	Under 25	Female	Undergraduate Degree	2	No	Very comfortable	Very willing	Yes	Unsure	Yes	Yes	Somewhat influential	Books or educational materials	Not collected in this dataset	No	No	No	0			FALSE	FALSE	FALSE	5
R-98	Rural	45-54	Male	Undergraduate Degree	1	No	Somewhat comfortable	Neutral	Yes	Yes	Yes	No	Neutral	General dentist, Internet, community members	Not collected in this dataset	No	No	No	0			TRUE	TRUE	TRUE	4
R-99	Rural	45-54	Female	Professional Degree	0	No	Neutral	Very willing	No	Yes	Yes	Yes	Neutral	Books or educational materials, community members	Not collected in this dataset	No	No	No	0			FALSE	TRUE	FALSE	3
R-100	Rural	Under 25	Female	Professional Degree	0	No	Neutral	Neutral	Yes	Yes	Yes	No	Neutral	Internet	Not collected in this dataset	No	No	No	0			FALSE	FALSE	TRUE	3
R-101	Rural	45-54	Female	Undergraduate Degree	1	No	Somewhat comfortable	Not very willing	Yes	Yes	No	No	Not influential at all	Internet, community members	Not collected in this dataset	No	No	No	0			FALSE	TRUE	TRUE	4
R-102	Rural	35-44	Female	Professional Degree	1	No	Neutral	Not very willing	Unsure	Yes	No	No	Somewhat influential	Internet, Books or educational materials, community members	Not collected in this dataset	No	No	No	0			FALSE	TRUE	TRUE	3
R-103	Rural	25-34	Male	Professional Degree	0	No	Neutral	Very willing	No	Yes	No	No	Neutral	Books or educational materials	Not collected in this dataset	No	No	No	0			FALSE	FALSE	FALSE	3
R-104	Rural	45-54	Female	Postgraduate Degree	0	No	Very comfortable	Somewhat willing	Yes	Yes	No	Yes	Not influential at all	Family and friends, Internet	Not collected in this dataset	No	No	No	0			FALSE	FALSE	TRUE	5
R-105	Rural	Under 25	Female	Postgraduate Degree	0	No	Neutral	Neutral	No	Yes	Yes	No	Not influential at all	Internet, community members	Not collected in this dataset	No	No	No	0			FALSE	TRUE	TRUE	3
R-106	Rural	Under 25	Male	Professional Degree	0	No	Neutral	Neutral	Unsure	Yes	No	Yes	Somewhat influential	Internet, community members	Not collected in this dataset	No	No	No	0			FALSE	TRUE	TRUE	3
R-107	Rural	Under 25	Male	Undergraduate Degree	0	No	Very comfortable	Very willing	Yes	Yes	Yes	Yes	Somewhat influential	General dentist	Not collected in this dataset	No	No	No	0			TRUE	FALSE	FALSE	5
R-108	Rural	45-54	Female	Postgraduate Degree	2	No	Neutral	Somewhat willing	Unsure	Yes	Yes	No	Neutral	Family and friends, Paediatric dentist, Books or educational materials	Not collected in this dataset	No	No	No	0			TRUE	FALSE	FALSE	3
R-109	Rural	35-44	Female	Undergraduate Degree	1	No	Somewhat uncomfortable	Neutral	No	Unsure	No	No	Neutral	General dentist, Internet, community members	Not collected in this dataset	No	No	No	0			TRUE	TRUE	TRUE	2
R-110	Rural	Under 25	Female	Undergraduate Degree	1	Yes	Neutral	Somewhat willing	Yes	Unsure	No	No	Neutral	Family and friends	Not collected in this dataset	No	No	No	1	No	Named	FALSE	FALSE	FALSE	3
R-111	Rural	25-34	Female	Professional Degree	0	No	Neutral	Neutral	Yes	Yes	No	No	Neutral	Paediatric dentist	Not collected in this dataset	No	No	No	0			TRUE	FALSE	FALSE	3
R-112	Rural	Under 25	Male	Undergraduate Degree	2	No	Somewhat comfortable	Very willing	Yes	Yes	No	No	Somewhat influential	General dentist, Internet	Not collected in this dataset	No	No	No	0			TRUE	FALSE	TRUE	4
R-113	Rural	45-54	Female	Undergraduate Degree	1	No	Very comfortable	Very willing	Unsure	Yes	Yes	Yes	Somewhat influential	General dentist	Not collected in this dataset	No	No	No	0			TRUE	FALSE	FALSE	5
R-114	Rural	25-34	Female	Professional Degree	2	Yes	Very comfortable	Very willing	Unsure	Yes	No	No	Very influential	Internet	Not collected in this dataset	No	No	No	1	No	Named	FALSE	FALSE	TRUE	5
R-115	Rural	35-44	Female	Professional Degree	1	No	Somewhat uncomfortable	Neutral	No	Yes	Yes	No	Neutral	Family and friends	Not collected in this dataset	No	No	No	0			FALSE	FALSE	FALSE	2
R-116	Rural	Under 25	Female	Postgraduate Degree	0	Yes	Very comfortable	Neutral	Yes	Yes	Yes	No	Neutral	General dentist, community members	Not collected in this dataset	No	No	No	1	No	Named	TRUE	TRUE	FALSE	5
R-117	Rural	45-54	Female	Undergraduate Degree	2	No	Somewhat comfortable	Not very willing	No	Yes	Yes	Yes	Neutral	Books or educational materials	Not collected in this dataset	No	No	Yes	0			FALSE	FALSE	FALSE	4
R-118	Rural	35-44	Male	Undergraduate Degree	2	No	Somewhat uncomfortable	Very willing	Yes	Yes	No	No	Somewhat influential	General dentist	Not collected in this dataset	No	No	Yes	0			TRUE	FALSE	FALSE	2
R-119	Rural	35-44	Male	Professional Degree	2	No	Neutral	Very willing	Yes	Yes	No	No	Neutral	General dentist	Not collected in this dataset	No	No	Yes	0			TRUE	FALSE	FALSE	3
R-120	Rural	45-54	Female	Undergraduate Degree	2	No	Neutral	Neutral	Yes	Yes	Yes	No	Somewhat influential	Family and friends	Not collected in this dataset	No	No	Yes	0			FALSE	FALSE	FALSE	3
R-121	Rural	45-54	Male	Professional Degree	0	No	Very comfortable	Neutral	No	Yes	Yes	No	Neutral	General dentist	Not collected in this dataset	No	No	Yes	0			TRUE	FALSE	FALSE	5
R-122	Rural	25-34	Male	Professional Degree	1	No	Neutral	Not very willing	Unsure	Unsure	Yes	No	Neutral	Family and friends	Not collected in this dataset	No	No	Yes	0			FALSE	FALSE	FALSE	3
R-123	Rural	25-34	Female	Professional Degree	2	No	Somewhat comfortable	Neutral	Yes	Yes	Yes	No	Neutral	Books or educational materials	Not collected in this dataset	No	No	Yes	0			FALSE	FALSE	FALSE	4
R-124	Rural	Under 25	Female	Professional Degree	1	No	Very comfortable	Neutral	Yes	Yes	No	Yes	Not very influential	Family and friends, community members	Not collected in this dataset	No	No	Yes	0			FALSE	TRUE	FALSE	5
R-125	Rural	Under 25	Female	Professional Degree	0	No	Neutral	Not very willing	Yes	Yes	No	No	Very influential	Internet	Not collected in this dataset	No	No	Yes	0			FALSE	FALSE	TRUE	3
R-126	Rural	Under 25	Female	Professional Degree	2	No	Very comfortable	Very willing	Yes	Yes	Yes	Yes	Somewhat influential	General dentist	Not collected in this dataset	No	No	Yes	0			TRUE	FALSE	FALSE	5
R-127	Rural	Under 25	Male	Postgraduate Degree	0	Yes	Very comfortable	Very willing	No	Yes	No	No	Neutral	General dentist	Not collected in this dataset	No	No	Yes	1	No	Named	TRUE	FALSE	FALSE	5
R-128	Rural	Under 25	Male	Postgraduate Degree	1	No	Neutral	Somewhat willing	No	Yes	Yes	No	Not very influential	Family and friends	Not collected in this dataset	No	No	Yes	0			FALSE	FALSE	FALSE	3
R-129	Rural	25-34	Female	Undergraduate Degree	1	No	Very comfortable	Very willing	No	Yes	Yes	No	Somewhat influential	General dentist, community members	Not collected in this dataset	No	No	Yes	0			TRUE	TRUE	FALSE	5
R-130	Rural	25-34	Female	Professional Degree	0	No	Very comfortable	Not very willing	No	Yes	Yes	No	Neutral	Family and friends	Not collected in this dataset	No	No	Yes	0			FALSE	FALSE	FALSE	5
R-131	Rural	Under 25	Female	Professional Degree	2	No	Very comfortable	Not very willing	Unsure	Yes	Yes	No	Neutral	Internet	Not collected in this dataset	No	No	Yes	0			FALSE	FALSE	TRUE	5
R-132	Rural	35-44	Male	Professional Degree	0	No	Neutral	Very willing	No	Yes	Yes	No	Neutral	Paediatric dentist, community members	Not collected in this dataset	No	No	Yes	0			TRUE	TRUE	FALSE	3
R-133	Rural	35-44	Female	Postgraduate Degree	2	No	Neutral	Somewhat willing	Unsure	Yes	No	No	Not very influential	Paediatric dentist	Not collected in this dataset	No	No	Yes	0			TRUE	FALSE	FALSE	3
R-134	Rural	45-54	Female	Professional Degree	2	No	Somewhat comfortable	Not willing at all	Yes	Yes	No	Yes	Very influential	Books or educational materials	Not collected in this dataset	No	No	Yes	0			FALSE	FALSE	FALSE	4
R-135	Rural	45-54	Female	Professional Degree	2	No	Very comfortable	Not very willing	Yes	No	No	Yes	Somewhat influential	Books or educational materials	Not collected in this dataset	No	No	Yes	0			FALSE	FALSE	FALSE	5
R-136	Rural	45-54	Female	Undergraduate Degree	2	No	Neutral	Very willing	Yes	Yes	Yes	No	Somewhat influential	Family and friends	Not collected in this dataset	No	No	Yes	0			FALSE	FALSE	FALSE	3
R-137	Rural	25-34	Male	Professional Degree	0	No	Very comfortable	Not very willing	Unsure	Yes	Yes	Yes	Very influential	Family and friends, community members	Not collected in this dataset	No	No	Yes	0			FALSE	TRUE	FALSE	5
R-138	Rural	25-34	Female	Professional Degree	2	No	Neutral	Neutral	No	Yes	No	Yes	Somewhat influential	Books or educational materials	Not collected in this dataset	No	No	Yes	0			FALSE	FALSE	FALSE	3
R-139	Rural	35-44	Female	Postgraduate Degree	1	No	Neutral	Not very willing	No	Yes	Yes	No	Neutral	Paediatric dentist	Not collected in this dataset	No	No	Yes	0			TRUE	FALSE	FALSE	3
R-140	Rural	Under 25	Male	Postgraduate Degree	0	No	Very comfortable	Neutral	Yes	Yes	No	No	Somewhat influential	Family and friends, General dentist	Not collected in this dataset	No	No	Yes	0			TRUE	FALSE	FALSE	5
R-141	Rural	25-34	Female	Postgraduate Degree	1	No	Very comfortable	Somewhat willing	Yes	Yes	Yes	No	Somewhat influential	Family and friends	Not collected in this dataset	No	No	Yes	0			FALSE	FALSE	FALSE	5
R-142	Rural	Under 25	Male	Undergraduate Degree	0	No	Somewhat comfortable	Very willing	Unsure	Yes	Yes	No	Neutral	Internet, community members	Not collected in this dataset	No	No	Yes	0			FALSE	TRUE	TRUE	4
R-143	Rural	25-34	Female	Undergraduate Degree	1	No	Neutral	Very willing	Unsure	Yes	No	Yes	Neutral	Books or educational materials, community members	Not collected in this dataset	No	No	Yes	0			FALSE	TRUE	FALSE	3
R-144	Rural	25-34	Female	Postgraduate Degree	0	No	Neutral	Neutral	Yes	Yes	Yes	No	Very influential	General dentist	Not collected in this dataset	No	No	Yes	0			TRUE	FALSE	FALSE	3
R-145	Rural	45-54	Female	Postgraduate Degree	1	No	Very comfortable	Somewhat willing	No	Yes	Yes	No	Neutral	Paediatric dentist	Not collected in this dataset	No	No	Yes	0			TRUE	FALSE	FALSE	5
R-146	Rural	Under 25	Female	Undergraduate Degree	2	No	Neutral	Neutral	Yes	Yes	No	No	Very influential	General dentist	Not collected in this dataset	No	No	Yes	0			TRUE	FALSE	FALSE	3
R-147	Rural	25-34	Female	Professional Degree	2	No	Somewhat comfortable	Somewhat willing	Yes	Yes	Yes	Yes	Neutral	Books or educational materials	Not collected in this dataset	No	No	Yes	0			FALSE	FALSE	FALSE	4
R-148	Rural	Under 25	Female	Postgraduate Degree	2	No	Neutral	Neutral	No	Unsure	Yes	No	Somewhat influential	Family and friends, community members	Not collected in this dataset	No	No	Yes	0			FALSE	TRUE	FALSE	3
R-149	Rural	25-34	Female	Professional Degree	0	No	Very comfortable	Not very willing	Unsure	Unsure	Yes	No	Somewhat influential	Paediatric dentist	Not collected in this dataset	No	No	Yes	0			TRUE	FALSE	FALSE	5
R-150	Rural	45-54	Female	Undergraduate Degree	0	No	Very comfortable	Not very willing	Unsure	Yes	Yes	Yes	Neutral	Family and friends	Not collected in this dataset	No	No	Yes	0			FALSE	FALSE	FALSE	5
R-151	Rural	45-54	Female	Postgraduate Degree	2	No	Very comfortable	Neutral	Yes	No	No	Yes	Neutral	Family and friends	Not collected in this dataset	No	No	Yes	0			FALSE	FALSE	FALSE	5
R-152	Rural	45-54	Female	Professional Degree	1	No	Somewhat comfortable	Not willing at all	No	Unsure	No	Yes	Neutral	Books or educational materials, community members	Not collected in this dataset	No	No	Yes	0			FALSE	TRUE	FALSE	4
R-153	Rural	25-34	Female	Postgraduate Degree	1	No	Somewhat comfortable	Very willing	Yes	Yes	Yes	No	Not very influential	General dentist	Not collected in this dataset	No	No	Yes	0			TRUE	FALSE	FALSE	4
R-154	Rural	Under 25	Female	Undergraduate Degree	1	No	Neutral	Not willing at all	Unsure	Yes	No	No	Somewhat influential	Internet	Not collected in this dataset	No	No	Yes	0			FALSE	FALSE	TRUE	3
R-155	Rural	45-54	Male	Undergraduate Degree	0	No	Very comfortable	Neutral	Unsure	Yes	Yes	No	Somewhat influential	Books or educational materials	Not collected in this dataset	No	No	Yes	0			FALSE	FALSE	FALSE	5
R-156	Rural	35-44	Male	Professional Degree	2	No	Somewhat comfortable	Very willing	Unsure	Yes	No	No	Somewhat influential	Family and friends	Not collected in this dataset	No	No	Yes	0			FALSE	FALSE	FALSE	4
R-157	Rural	45-54	Male	Undergraduate Degree	1	No	Very comfortable	Very willing	Unsure	Yes	No	Yes	Very influential	Internet	Not collected in this dataset	No	No	Yes	0			FALSE	FALSE	TRUE	5
R-158	Rural	45-54	Male	Undergraduate Degree	2	No	Neutral	Very willing	Yes	Yes	Yes	Yes	Very influential	General dentist	Not collected in this dataset	No	No	Yes	0			TRUE	FALSE	FALSE	3
R-159	Rural	25-34	Female	Professional Degree	1	No	Neutral	Not very willing	Unsure	Yes	Yes	No	Very influential	Family and friends, Internet, Books or educational materials	Not collected in this dataset	No	No	Yes	0			FALSE	FALSE	TRUE	3
R-160	Rural	35-44	Female	Professional Degree	2	Yes	Neutral	Neutral	No	Yes	Yes	No	Somewhat influential	Books or educational materials	Not collected in this dataset	No	No	Yes	1	No	Named	FALSE	FALSE	FALSE	3
